# Supplementary material for: New Metabolites and Bioactive Chlorinated Benzophenone Derivatives Produced by a Marine-Derived Fungus Pestalotiopsis heterocornis
Source: MDPI journal article supplement (doi:10.3390/md15030069), 2017-03-13
Supplement: s1 [file s1]

# New Metabolites and Bioactive Chlorinated Benzophenone Derivatives Produced by a Marine-Derived Fungus *Pestalotiopsis heterocornis*

Hui Lei <sup>1</sup>, Xiuping Lin <sup>2</sup>, Li Han <sup>1,\*</sup>, Jian Ma <sup>1</sup>, Qingjuan Ma <sup>1</sup>, Jialiang Zhong <sup>3</sup>, Yonghong Liu <sup>2</sup>, Tiemin Sun <sup>4</sup>, Jinhui Wang <sup>4</sup> and Xueshi Huang <sup>1,\*</sup>

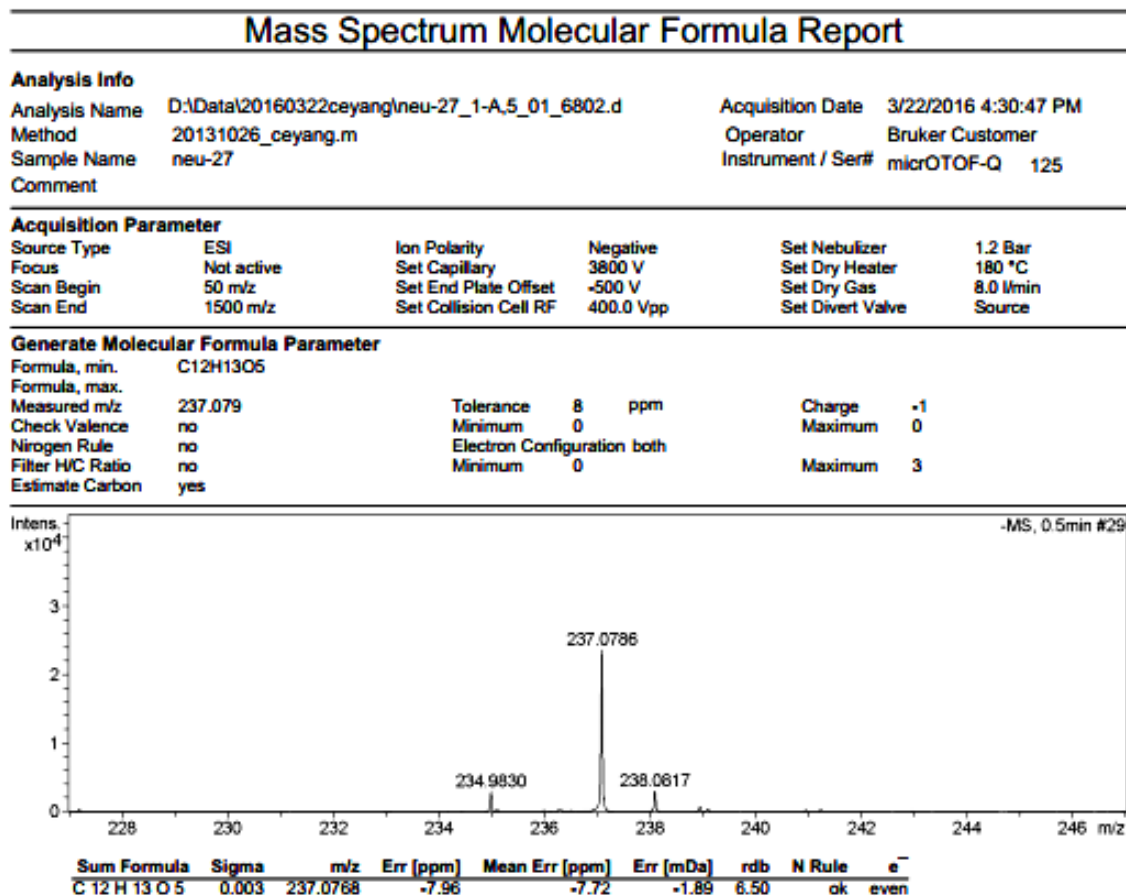

Figure S1. High-resolution electrospray ionization–mass spectrometry (HRESI–MS) spectrum of new compound 1

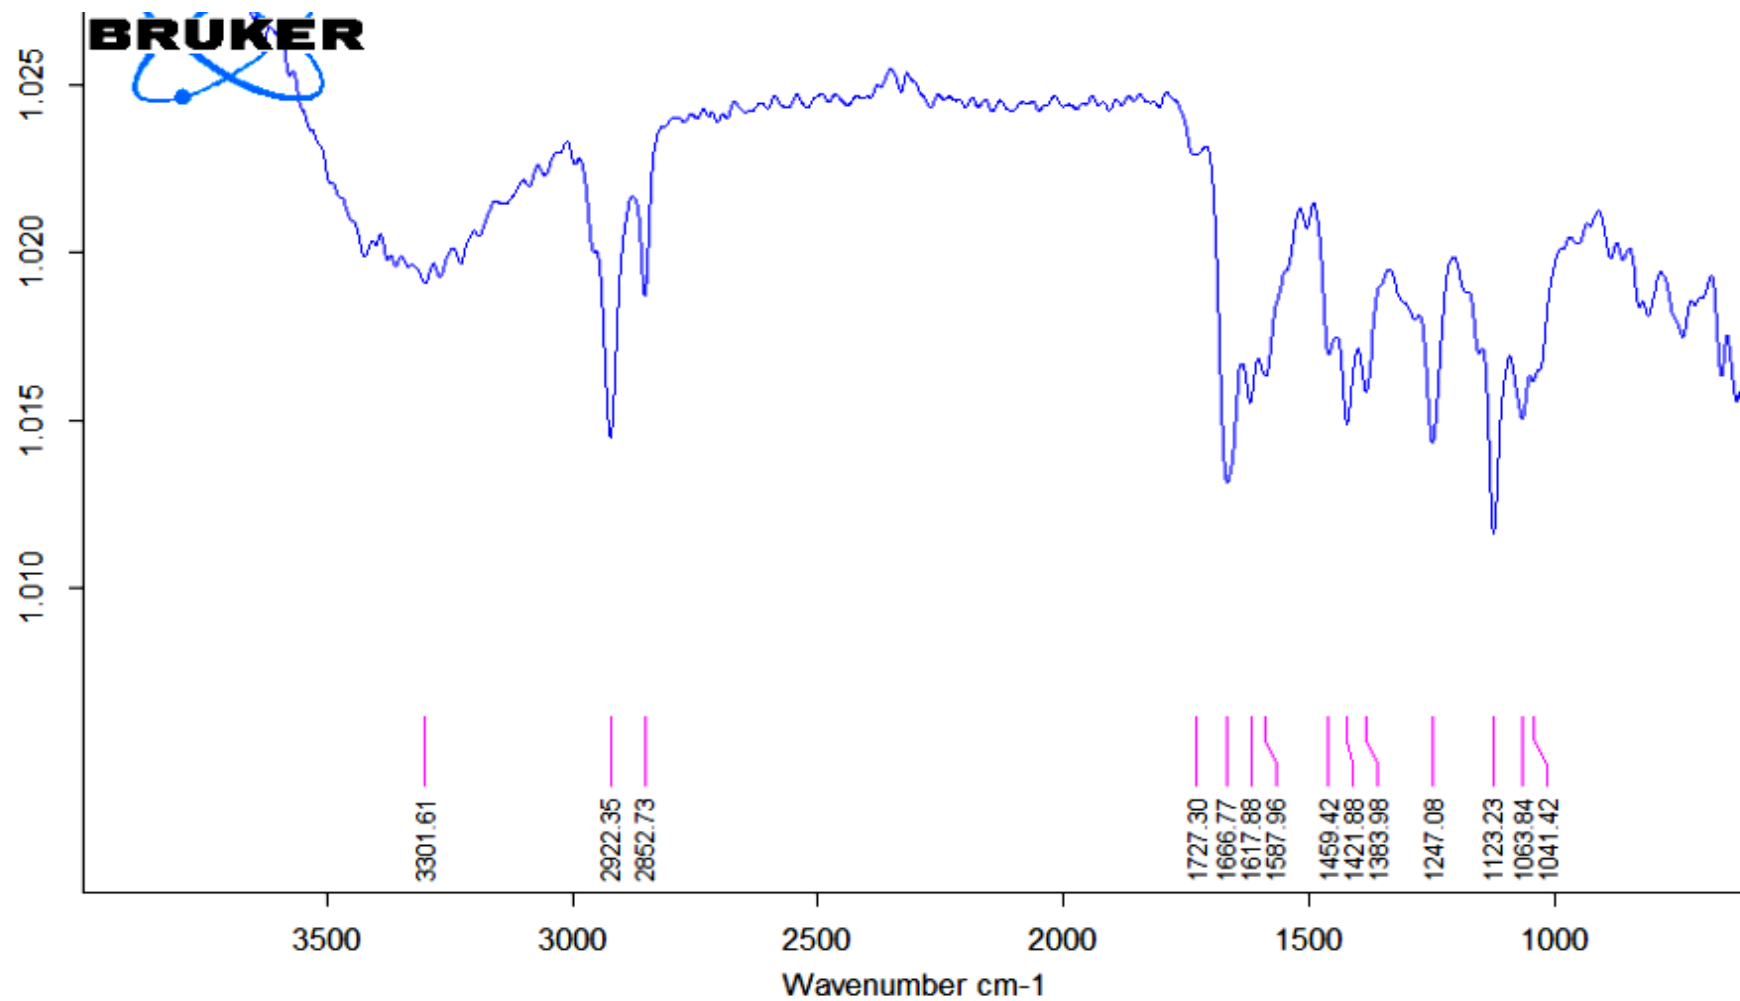

Figure S2. Infra-red (IR) spectrum of new compound 1

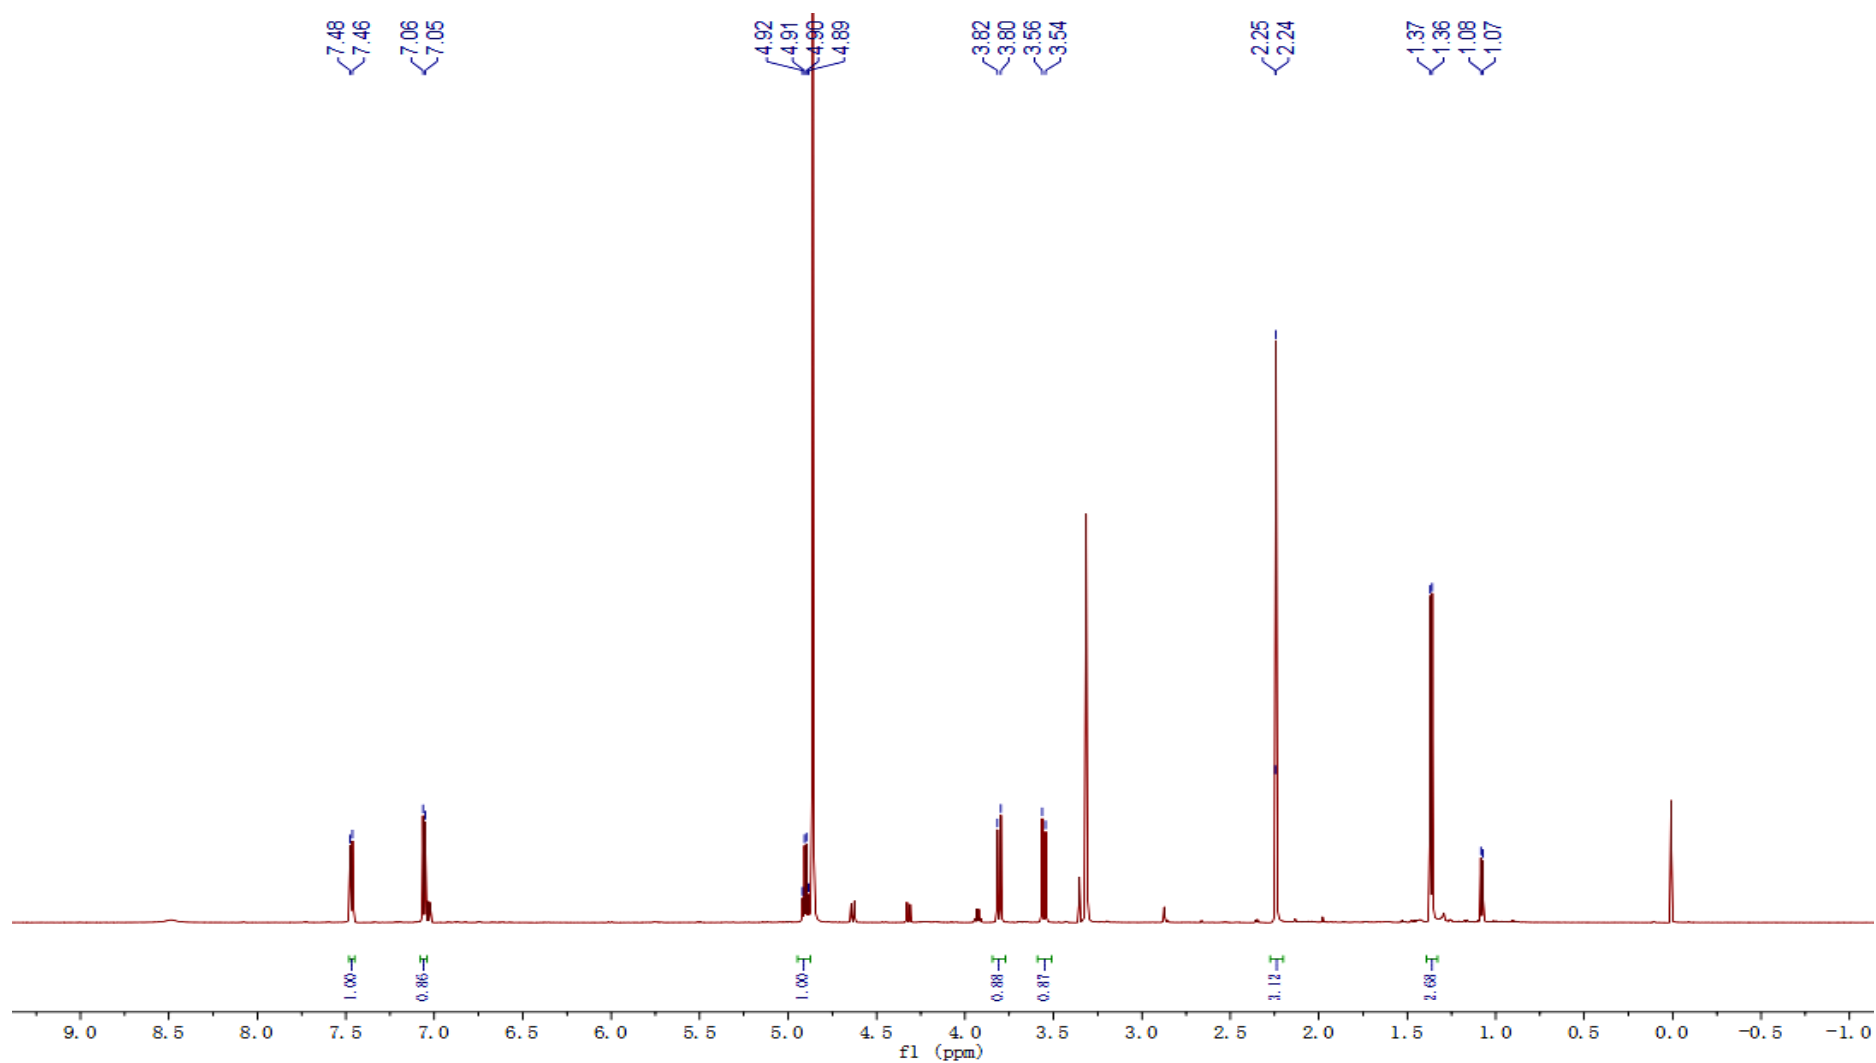

Figure S3. <sup>1</sup>H nuclear magnetic resonance (NMR) (600 MHz, CD<sub>3</sub>OD) spectrum of new compound 1

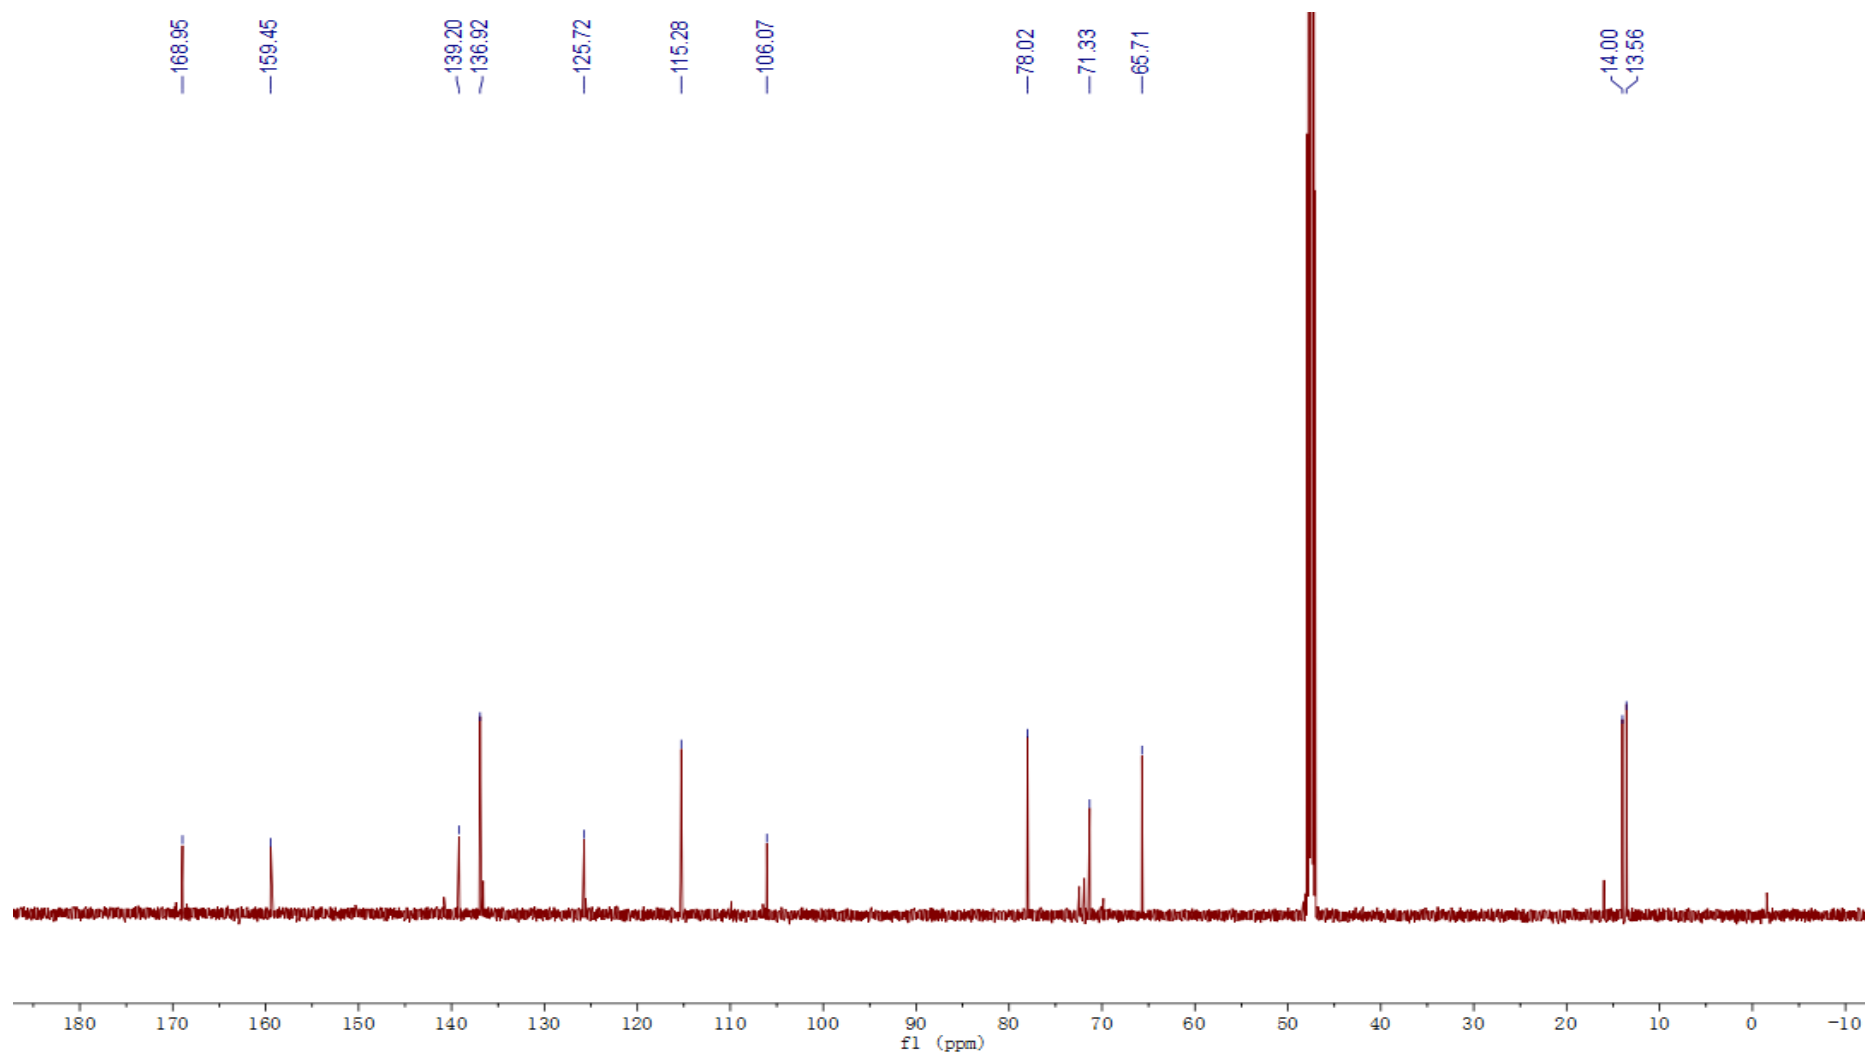

Figure S4. <sup>13</sup>C NMR (150 MHz, CD<sub>3</sub>OD) spectrum of new compound 1

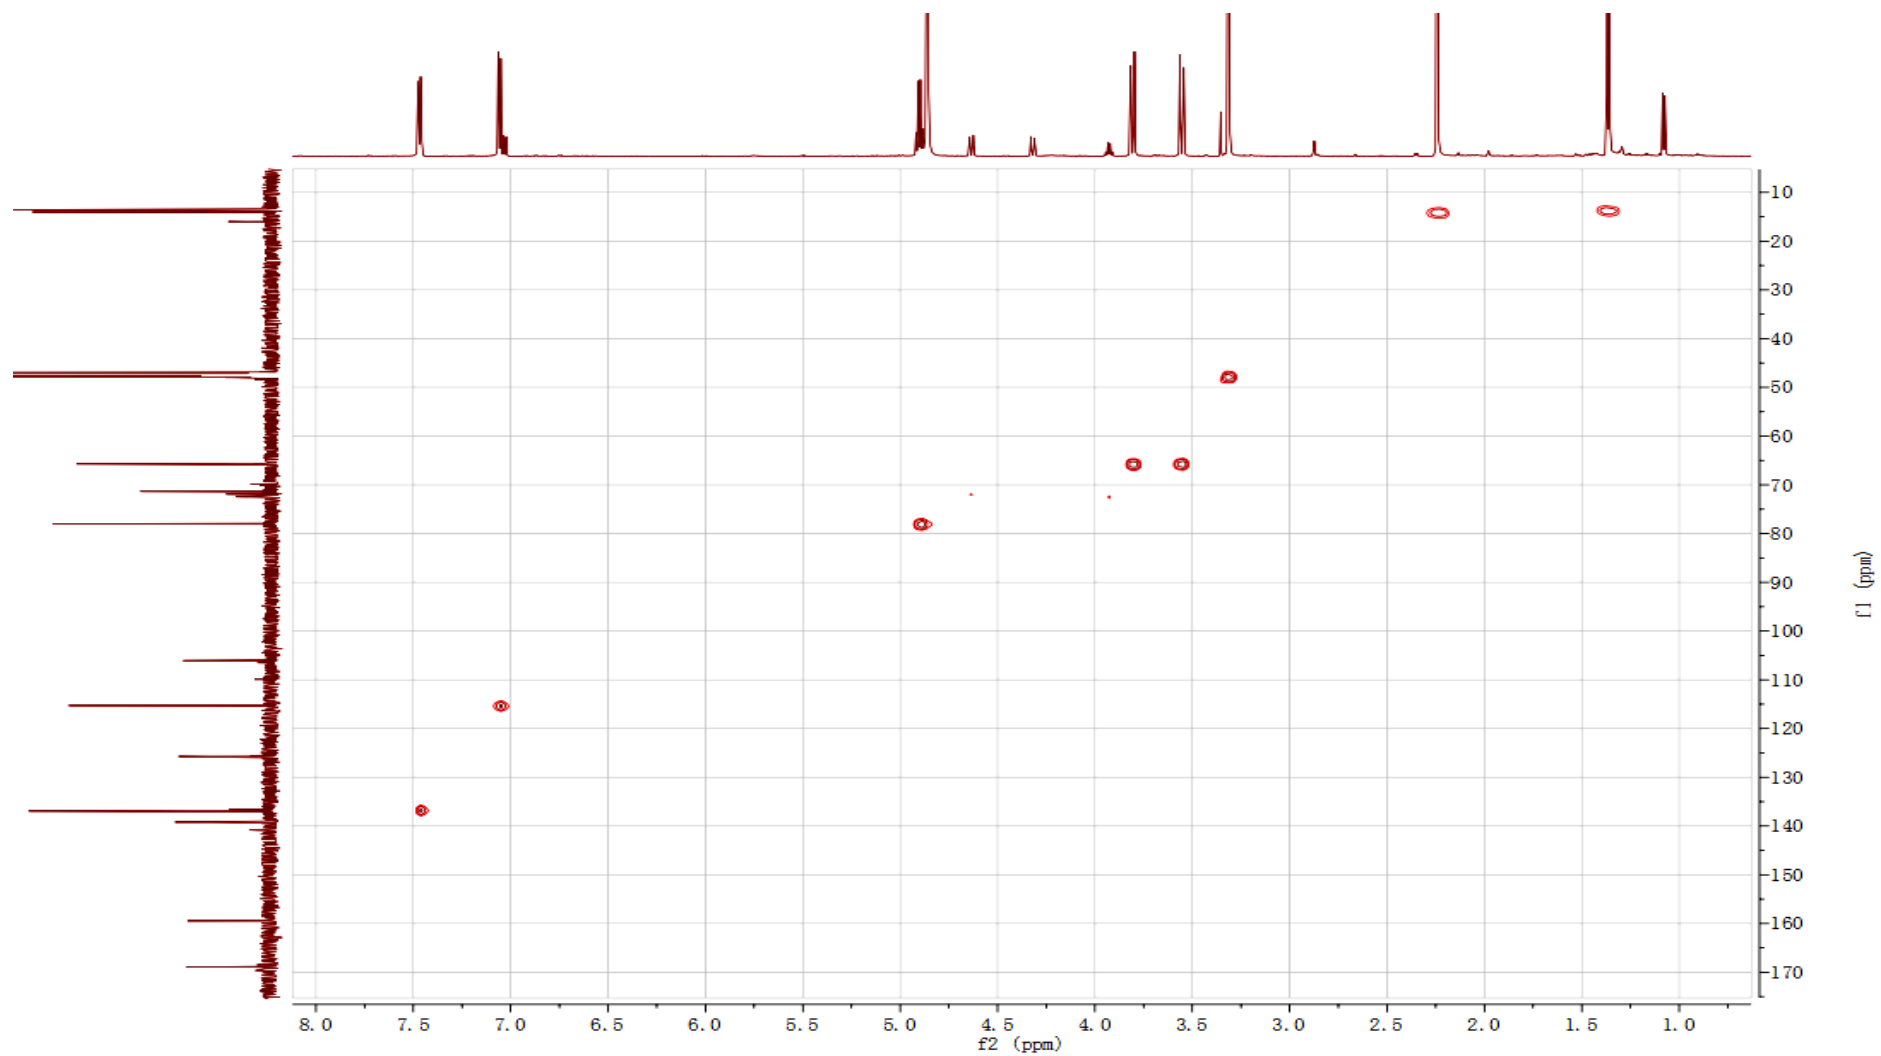

Figure S5. Heteronuclear single quantum coherence (HSQC) spectrum of new compound 1

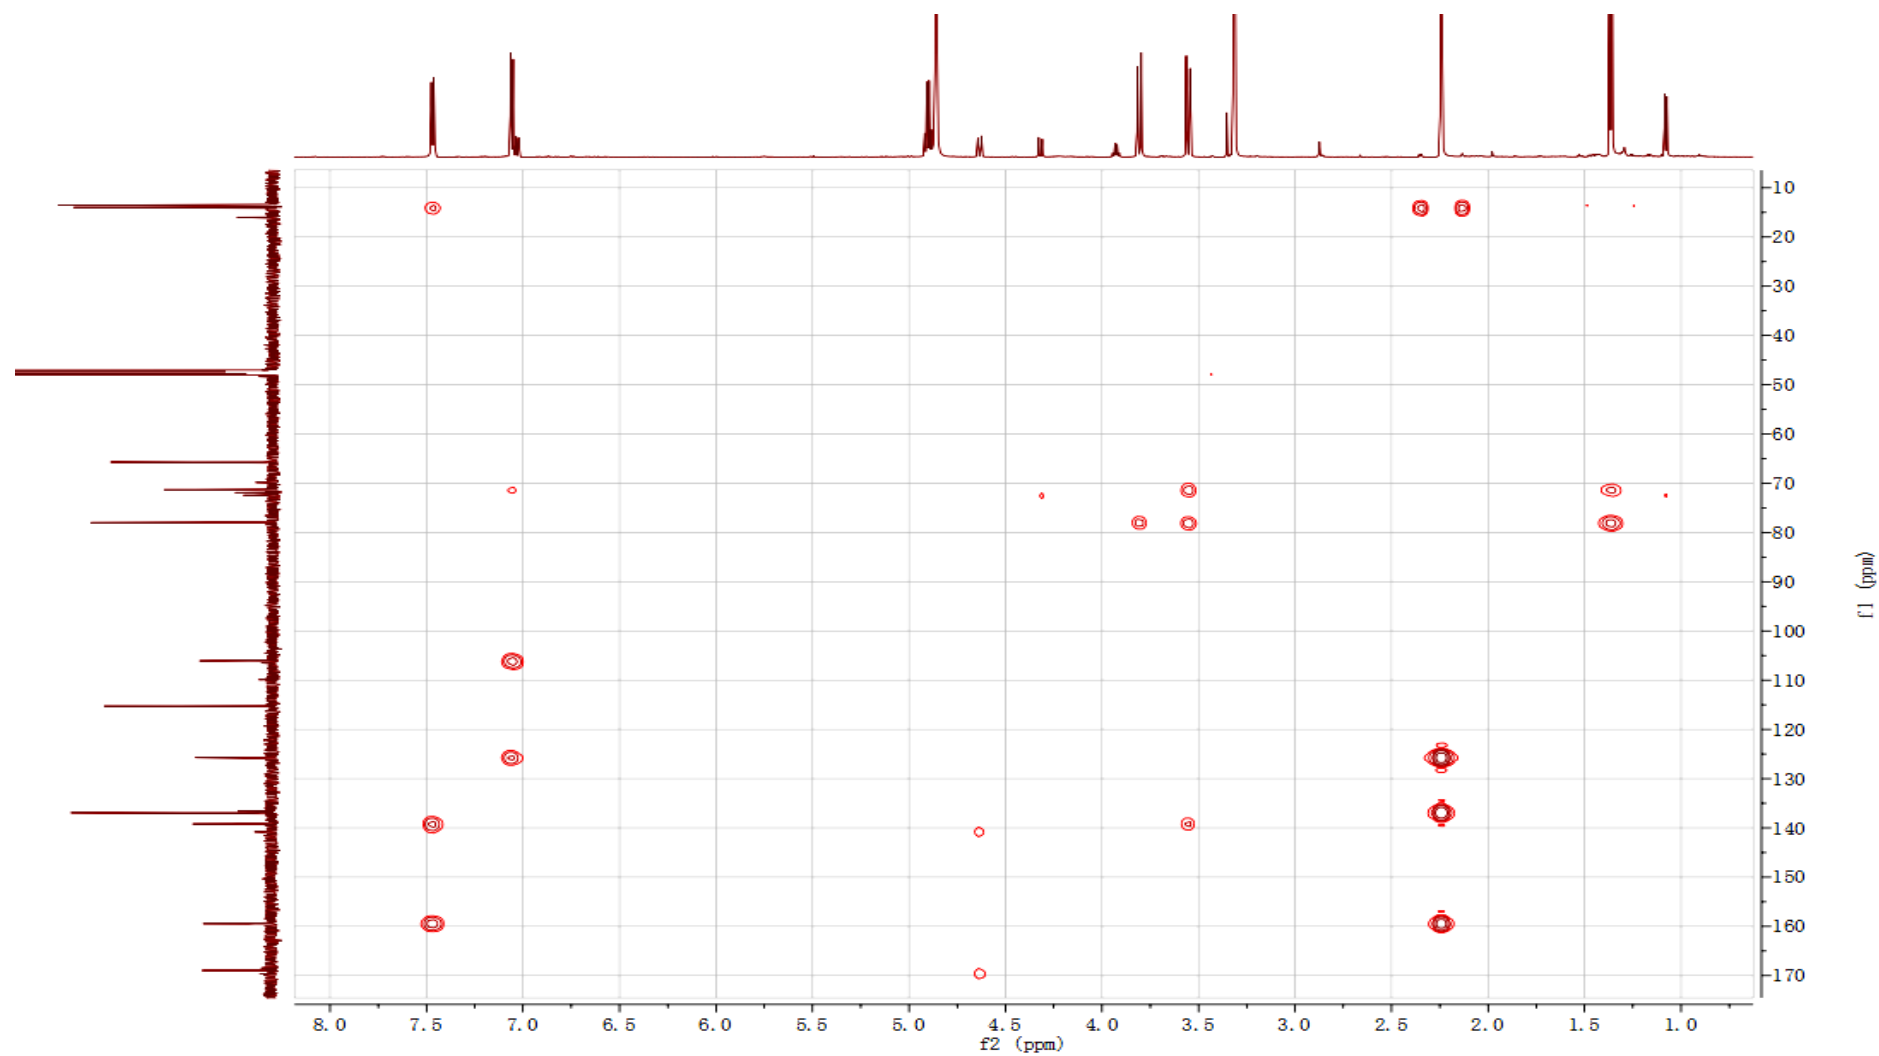

Figure S6. Heteronuclear multiple-bond correlation spectroscopy (HMBC) spectrum of new compound 1

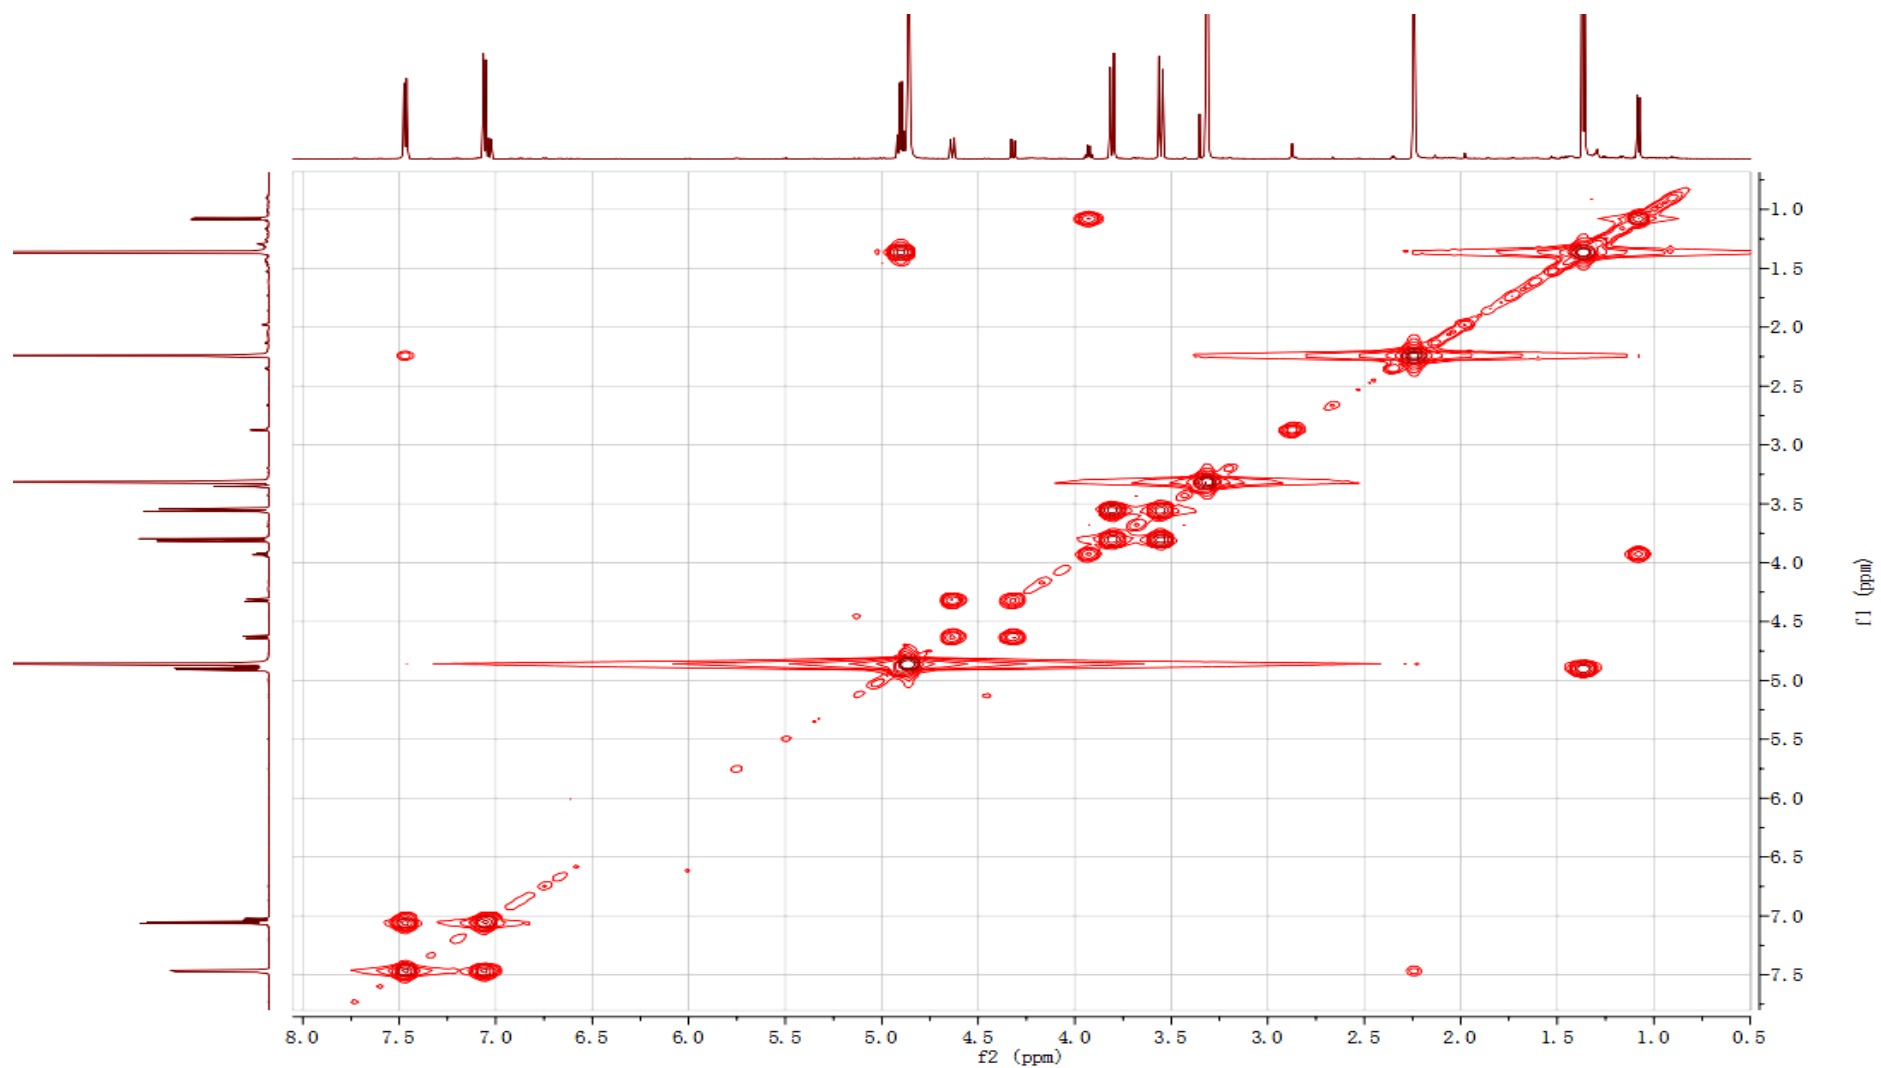

Figure S7. Correlation spectroscopy (COSY) spectrum of new compound 1

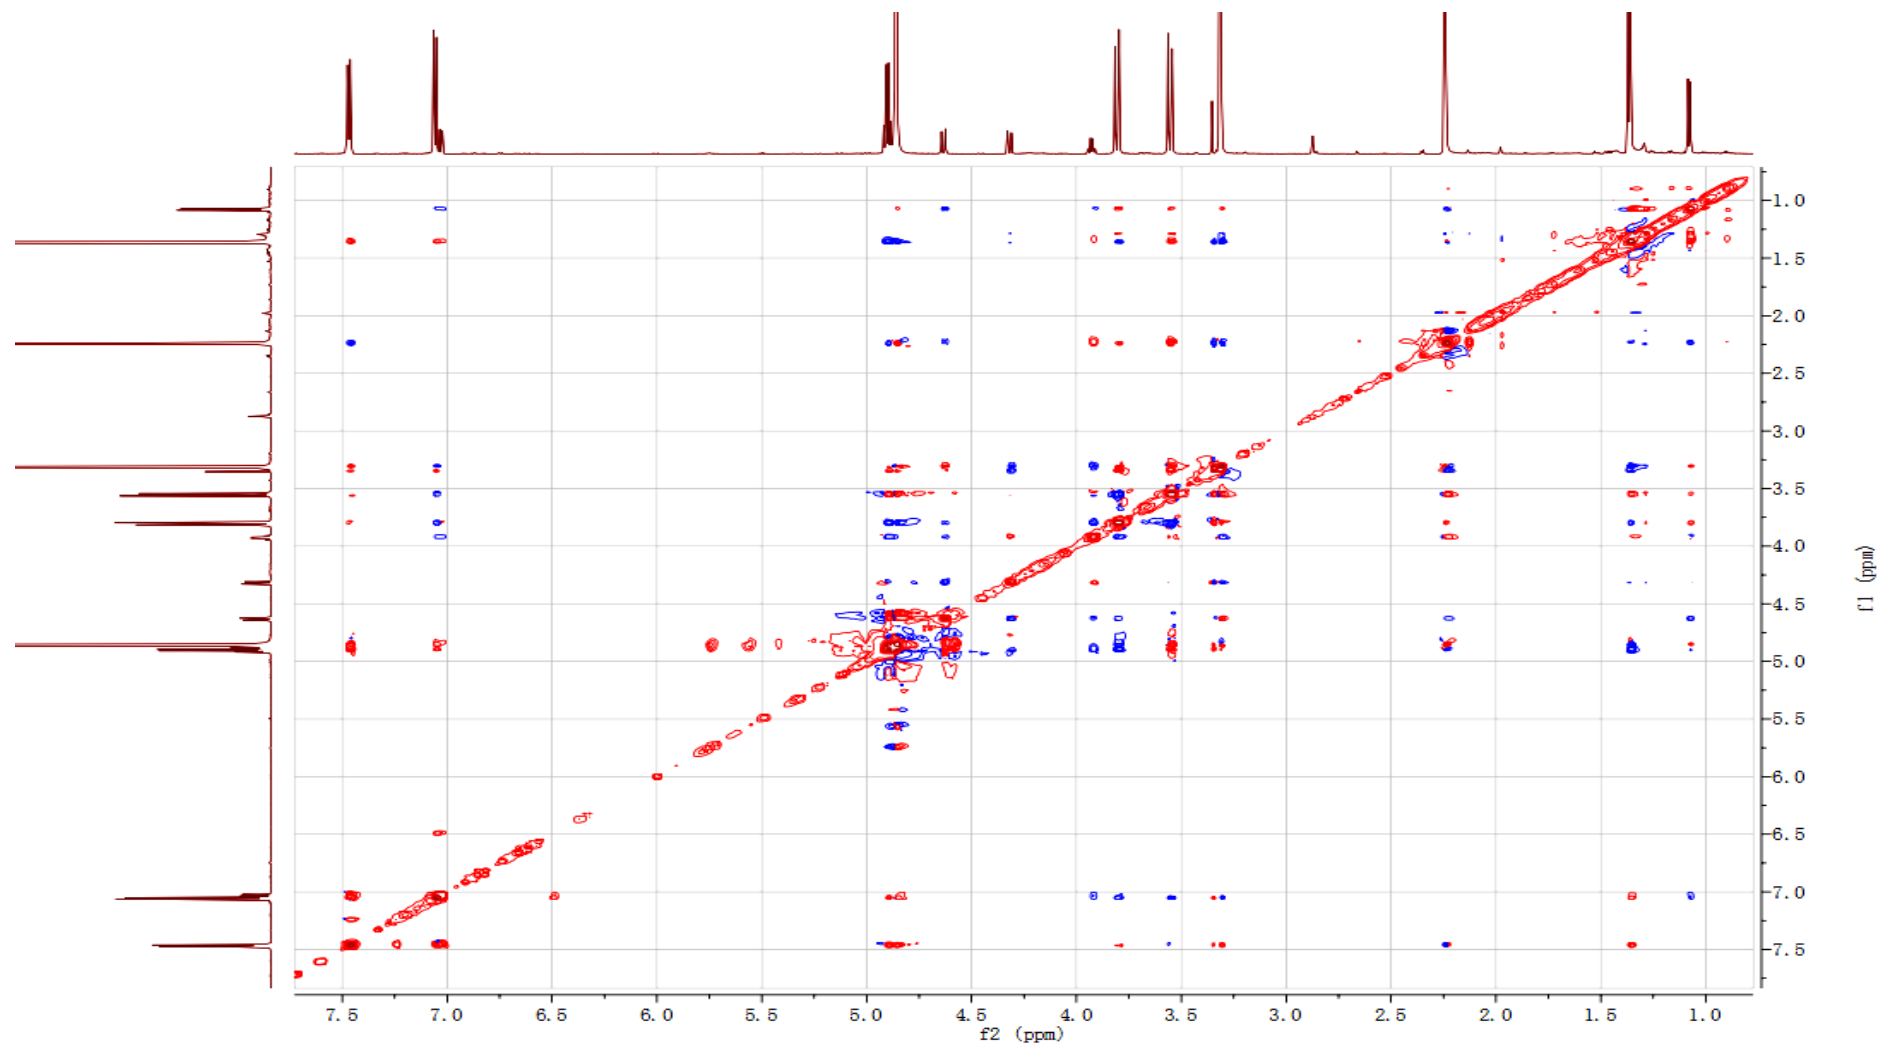

**Figure S8.** Nuclear overhauser effect spectroscopy (NOESY) spectrum of new compound 1



## Mass Spectrum Molecular Formula Report

### Analysis Info

Analysis Name D:\Data\20160322ceyang\neu-26\_1-A,4\_01\_6801.d  
 Method 20131026\_ceyang.m  
 Sample Name neu-26  
 Comment

Acquisition Date 3/22/2016 4:26:37 PM

Instrument / Ser# Bruker Customer  
 Operator micrOTOF-Q 125

### Acquisition Parameter

|             |            |                       |           |                  |           |
|-------------|------------|-----------------------|-----------|------------------|-----------|
| Source Type | ESI        | Ion Polarity          | Negative  | Set Nebulizer    | 1.2 Bar   |
| Focus       | Not active | Set Capillary         | 3800 V    | Set Dry Heater   | 180 °C    |
| Scan Begin  | 50 m/z     | Set End Plate Offset  | -500 V    | Set Dry Gas      | 8.0 l/min |
| Scan End    | 1500 m/z   | Set Collision Cell RF | 400.0 Vpp | Set Divert Valve | Source    |

### Generate Molecular Formula Parameter

|                  |                        |         |
|------------------|------------------------|---------|
| Formula, min.    |                        |         |
| Formula, max.    |                        |         |
| Measured m/z     | Tolerance              | Charge  |
| Check Valence    | Minimum                | Maximum |
| Nitrogen Rule    | Electron Configuration |         |
| Filter H/C Ratio | Minimum                | Maximum |
| Estimate Carbon  |                        |         |

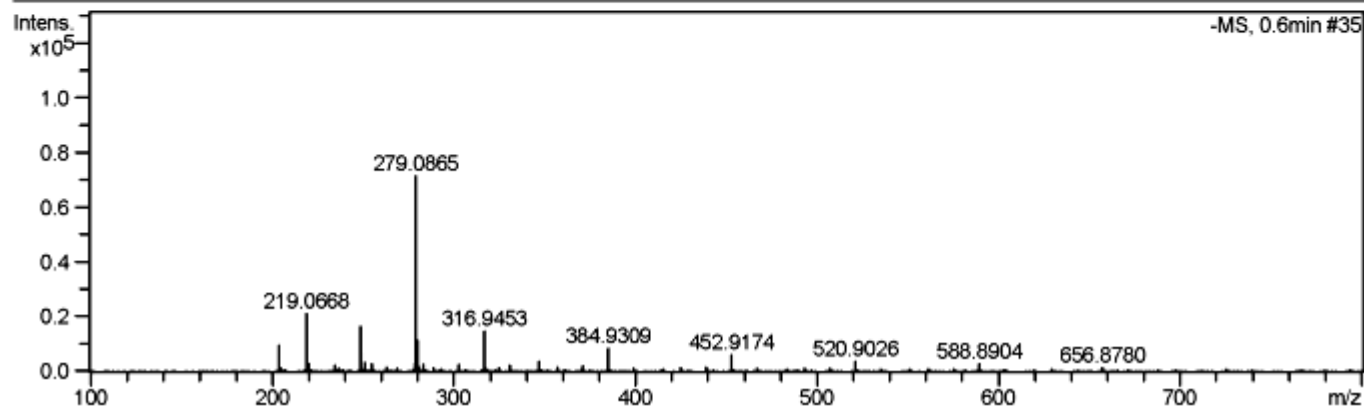

Figure S9. HRESI-MS spectrum of new compound 2

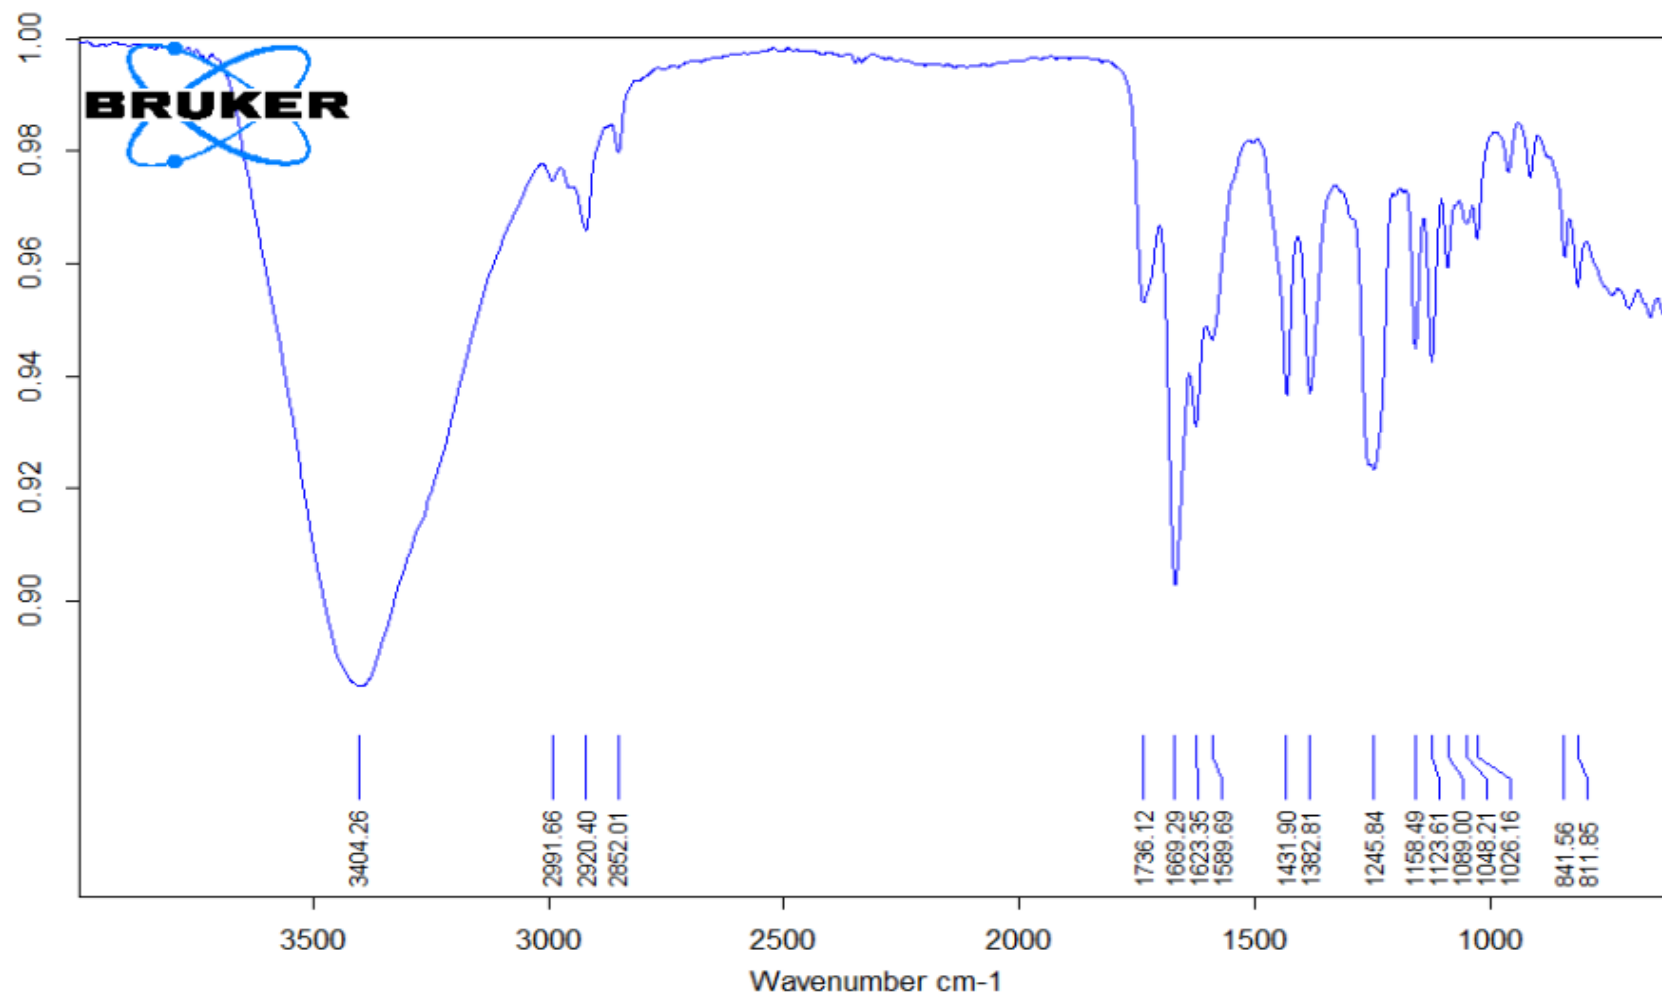

Figure S10. IR spectrum of the new compound 2

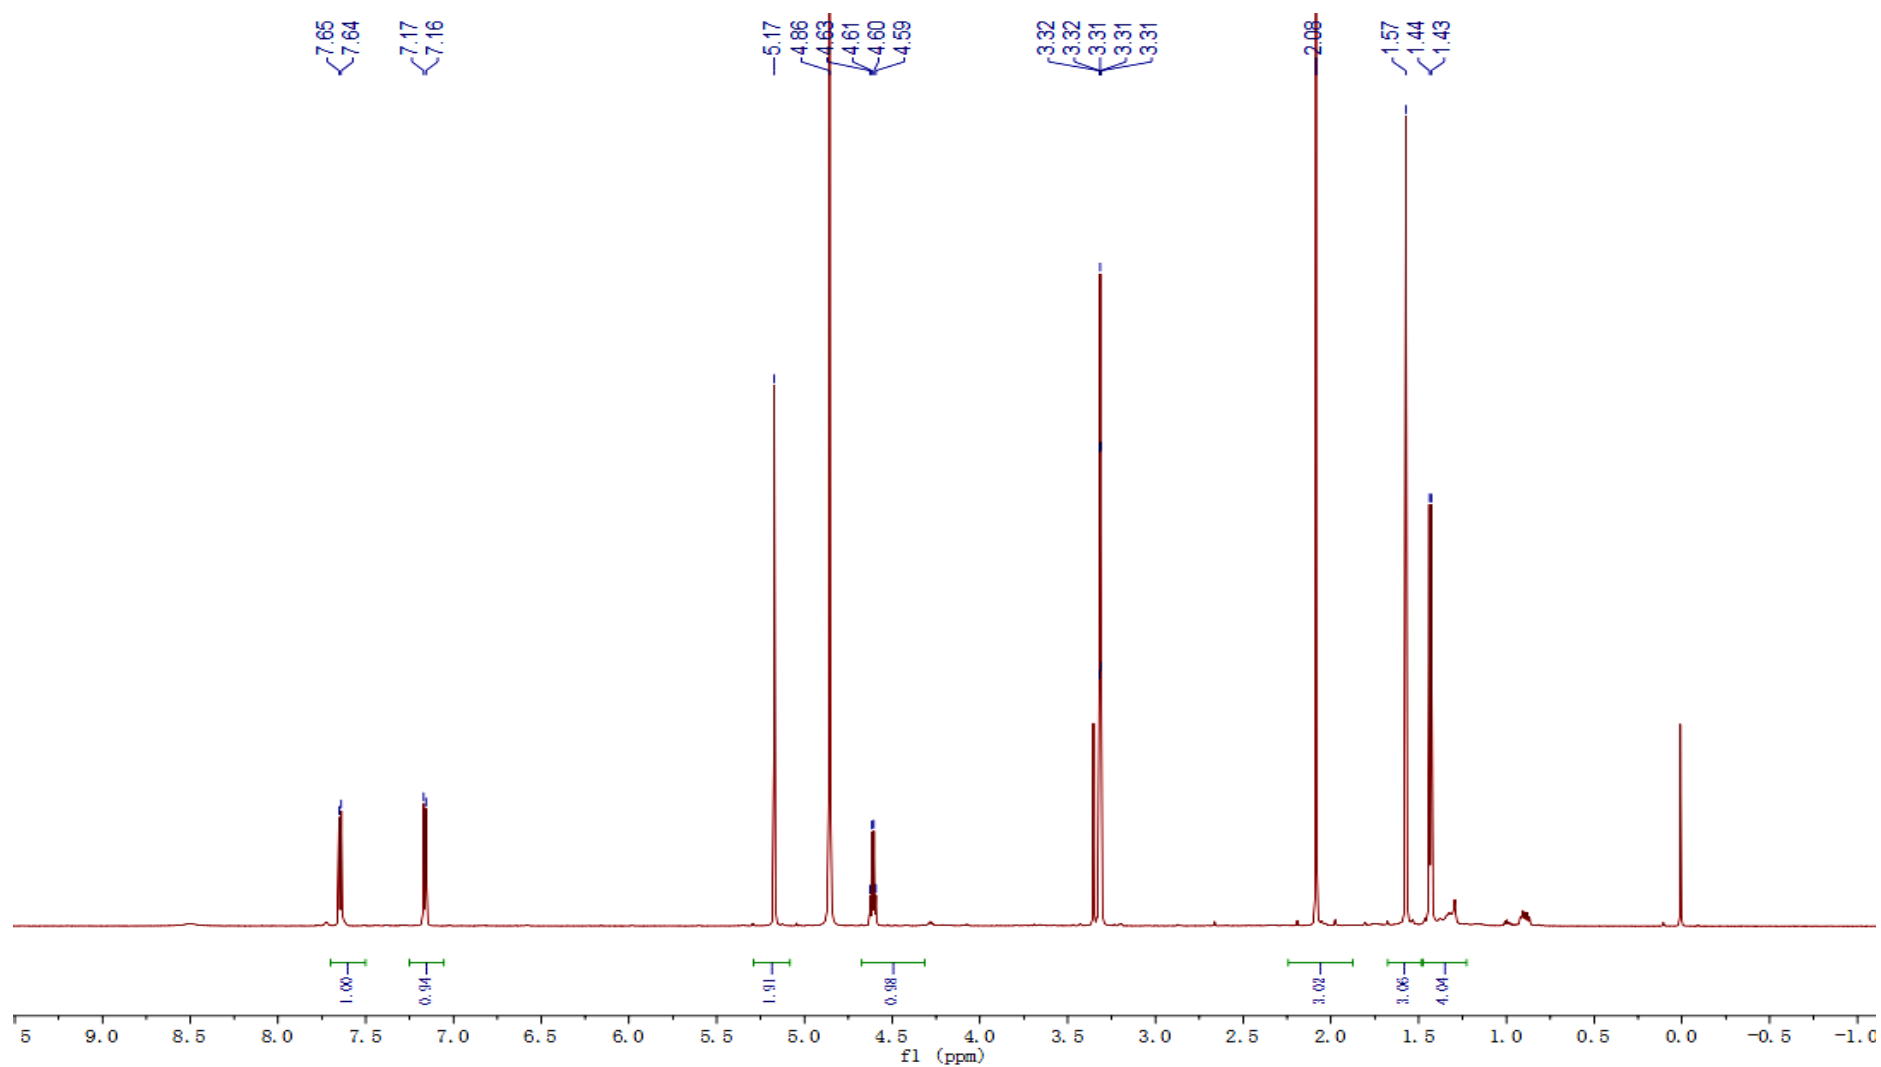

Figure S11. <sup>1</sup>H NMR (600 MHz, CD<sub>3</sub>OD) spectrum of new compound 2

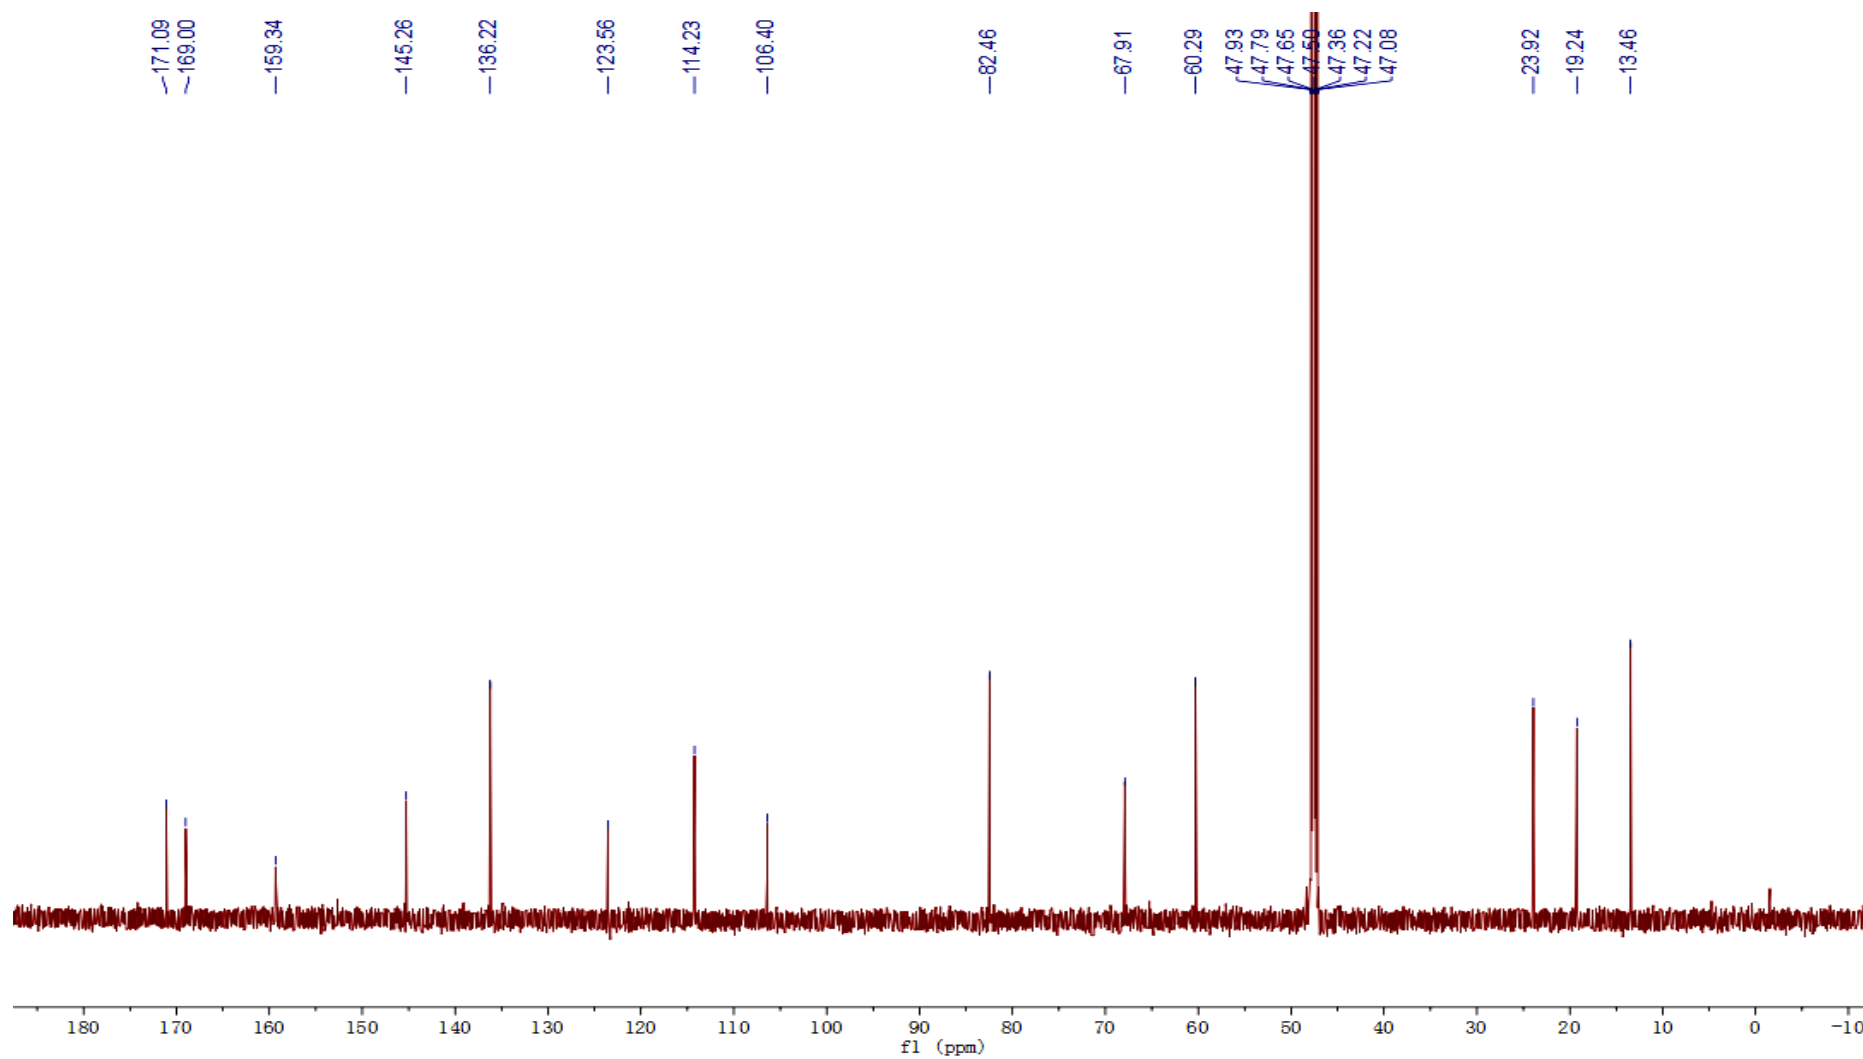

Figure S12. <sup>13</sup>C NMR (150 MHz, CD<sub>3</sub>OD) spectrum of new compound 2

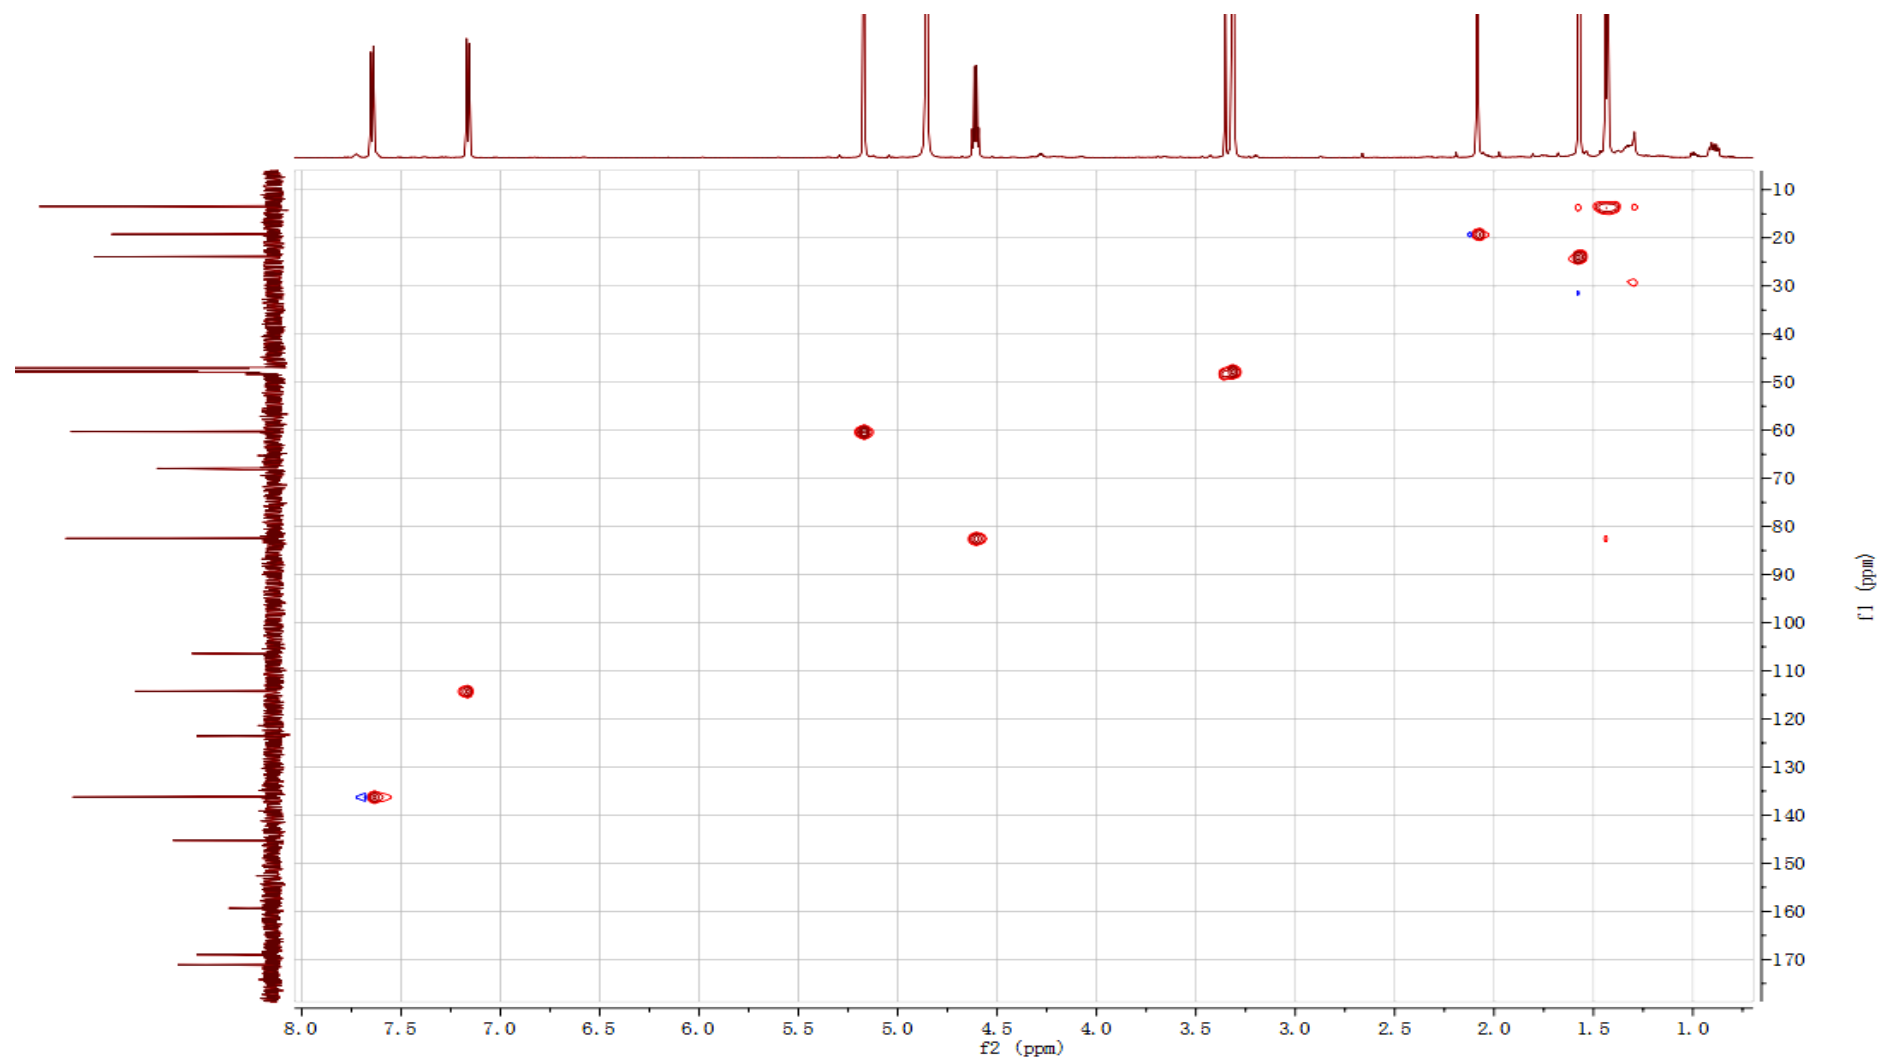

Figure S13. HSQC spectrum of new compound 2

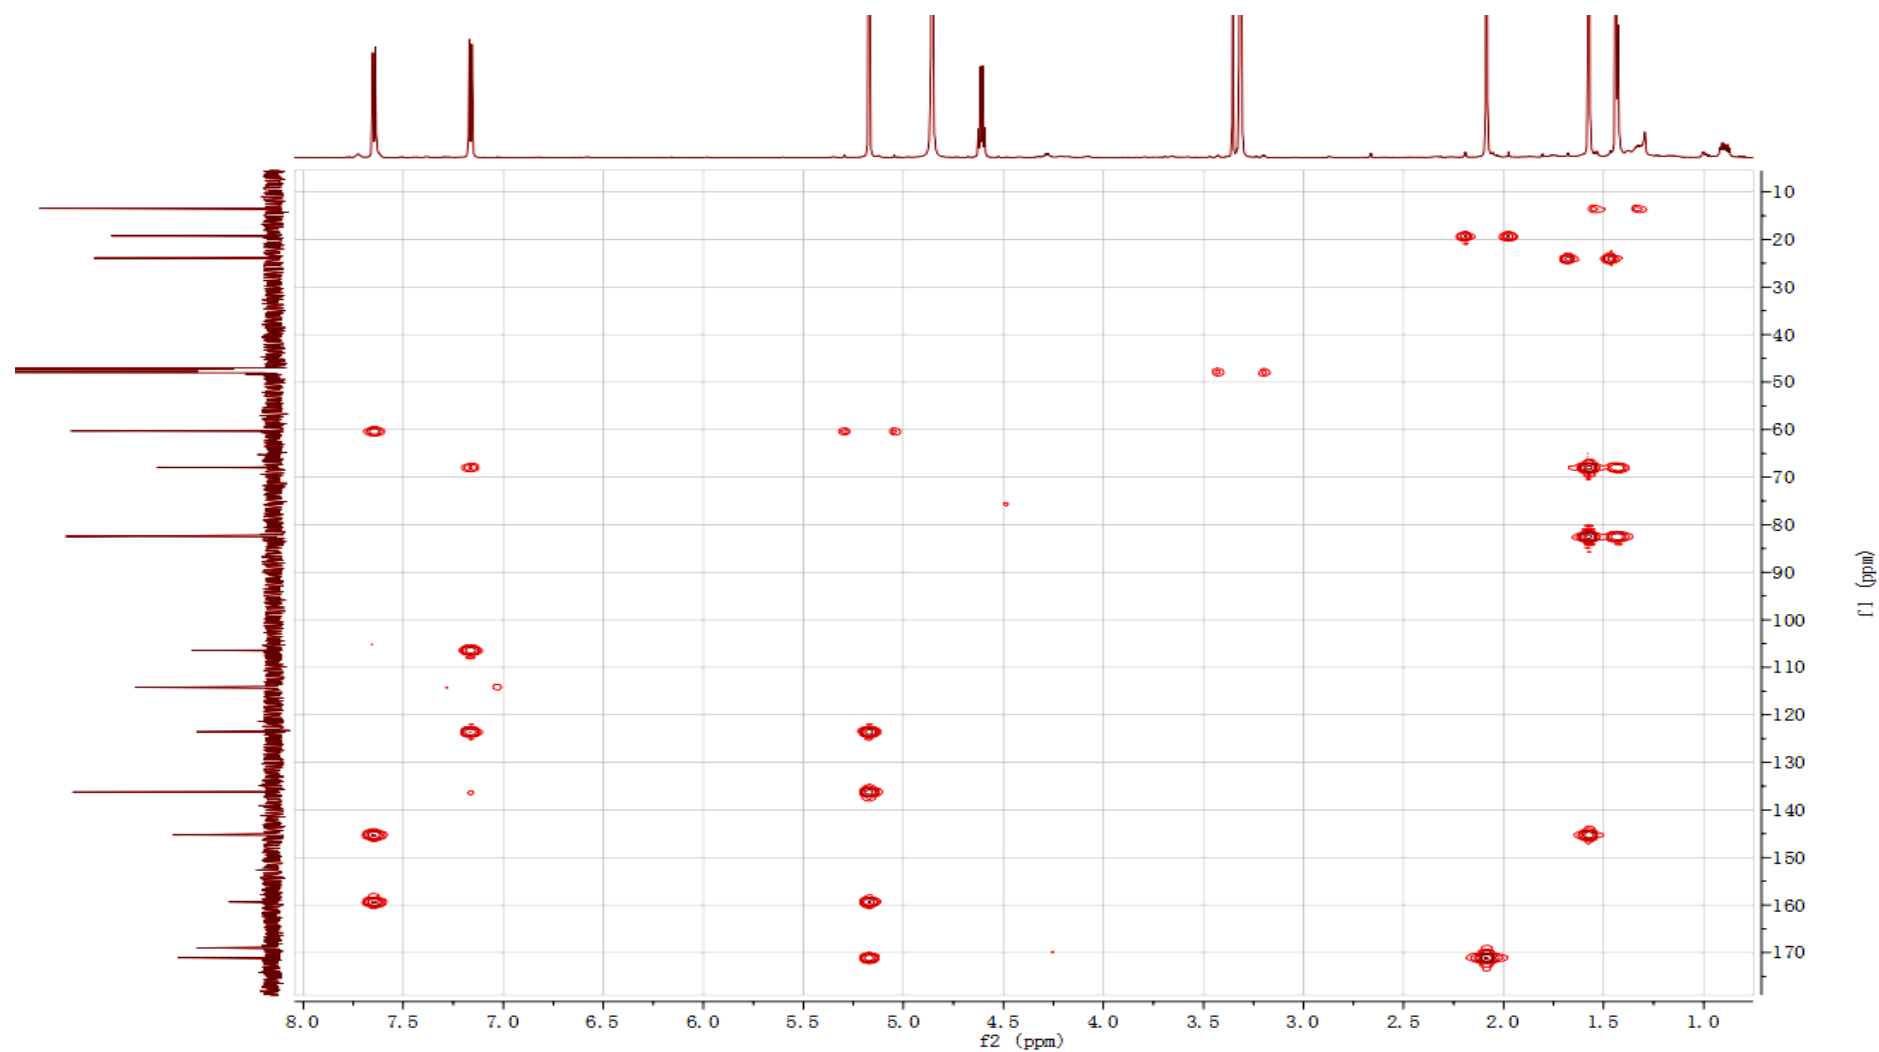

Figure S14. HMBC spectrum of new compound 2

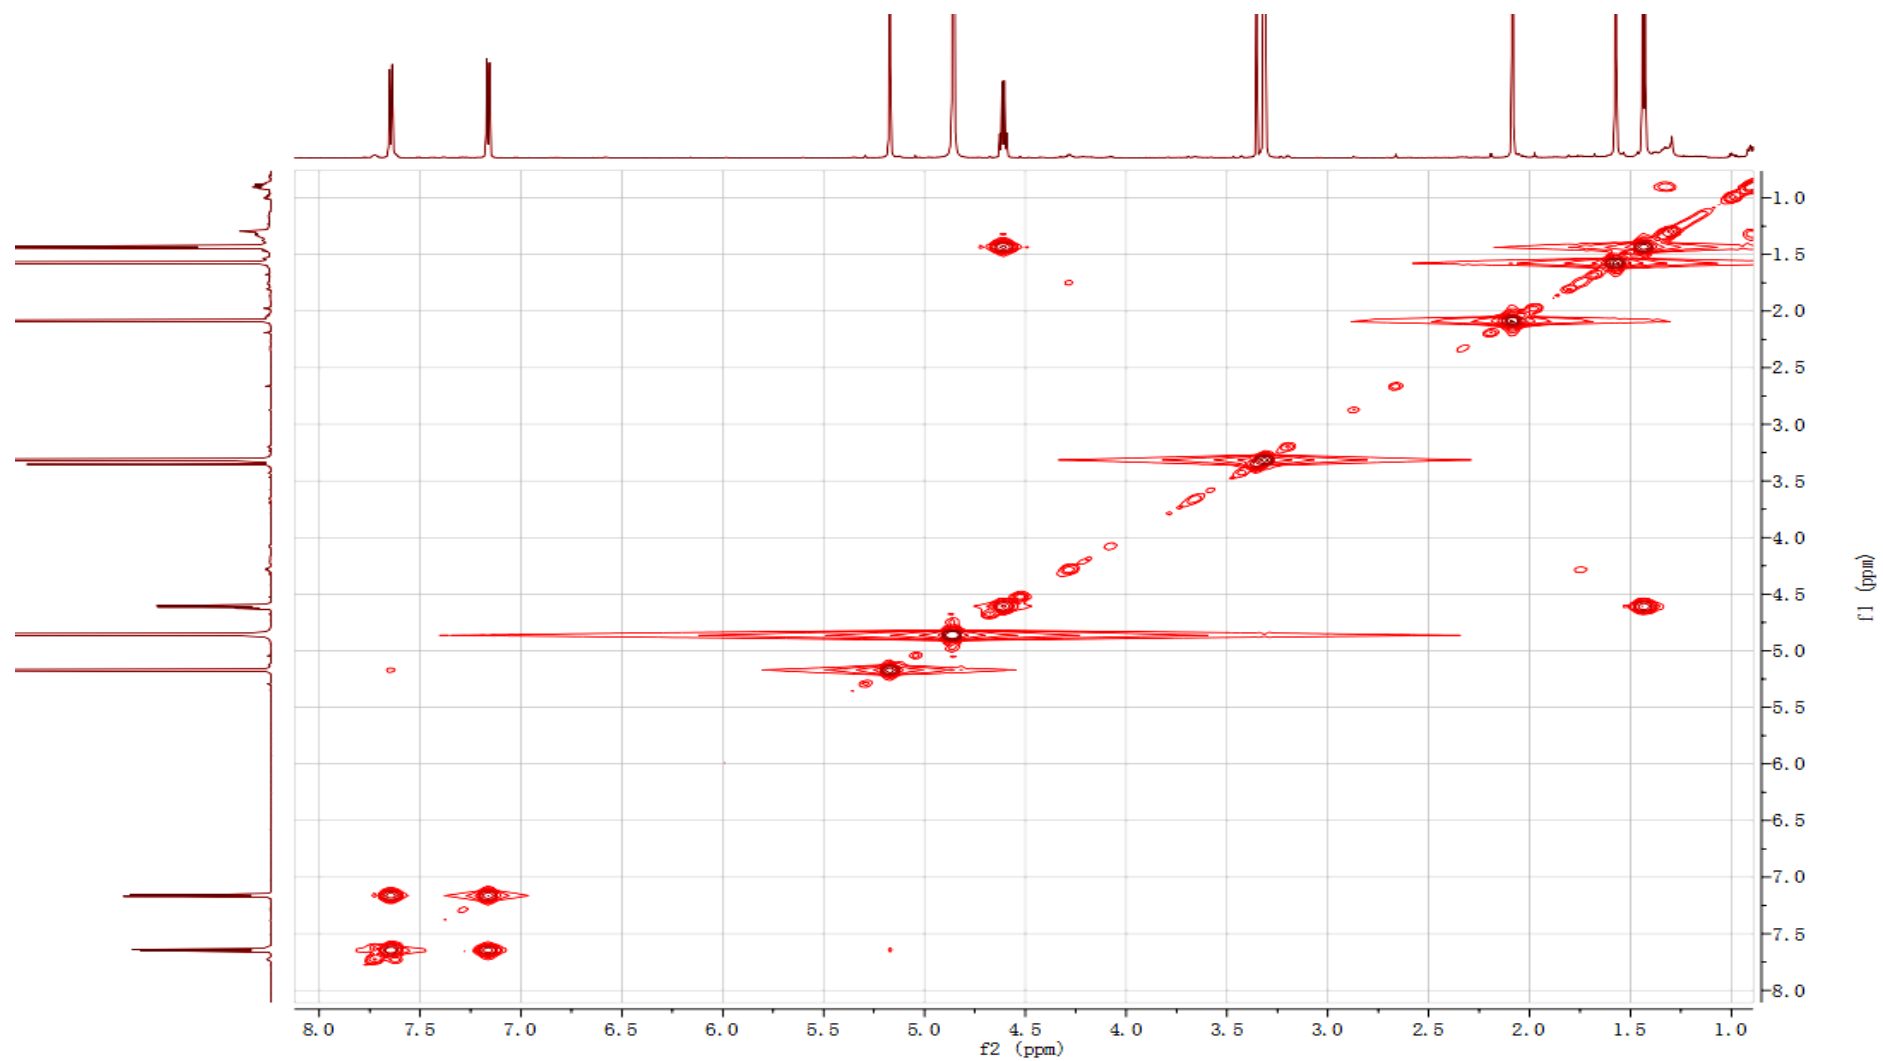

Figure S15. COSY spectrum of new compound 2

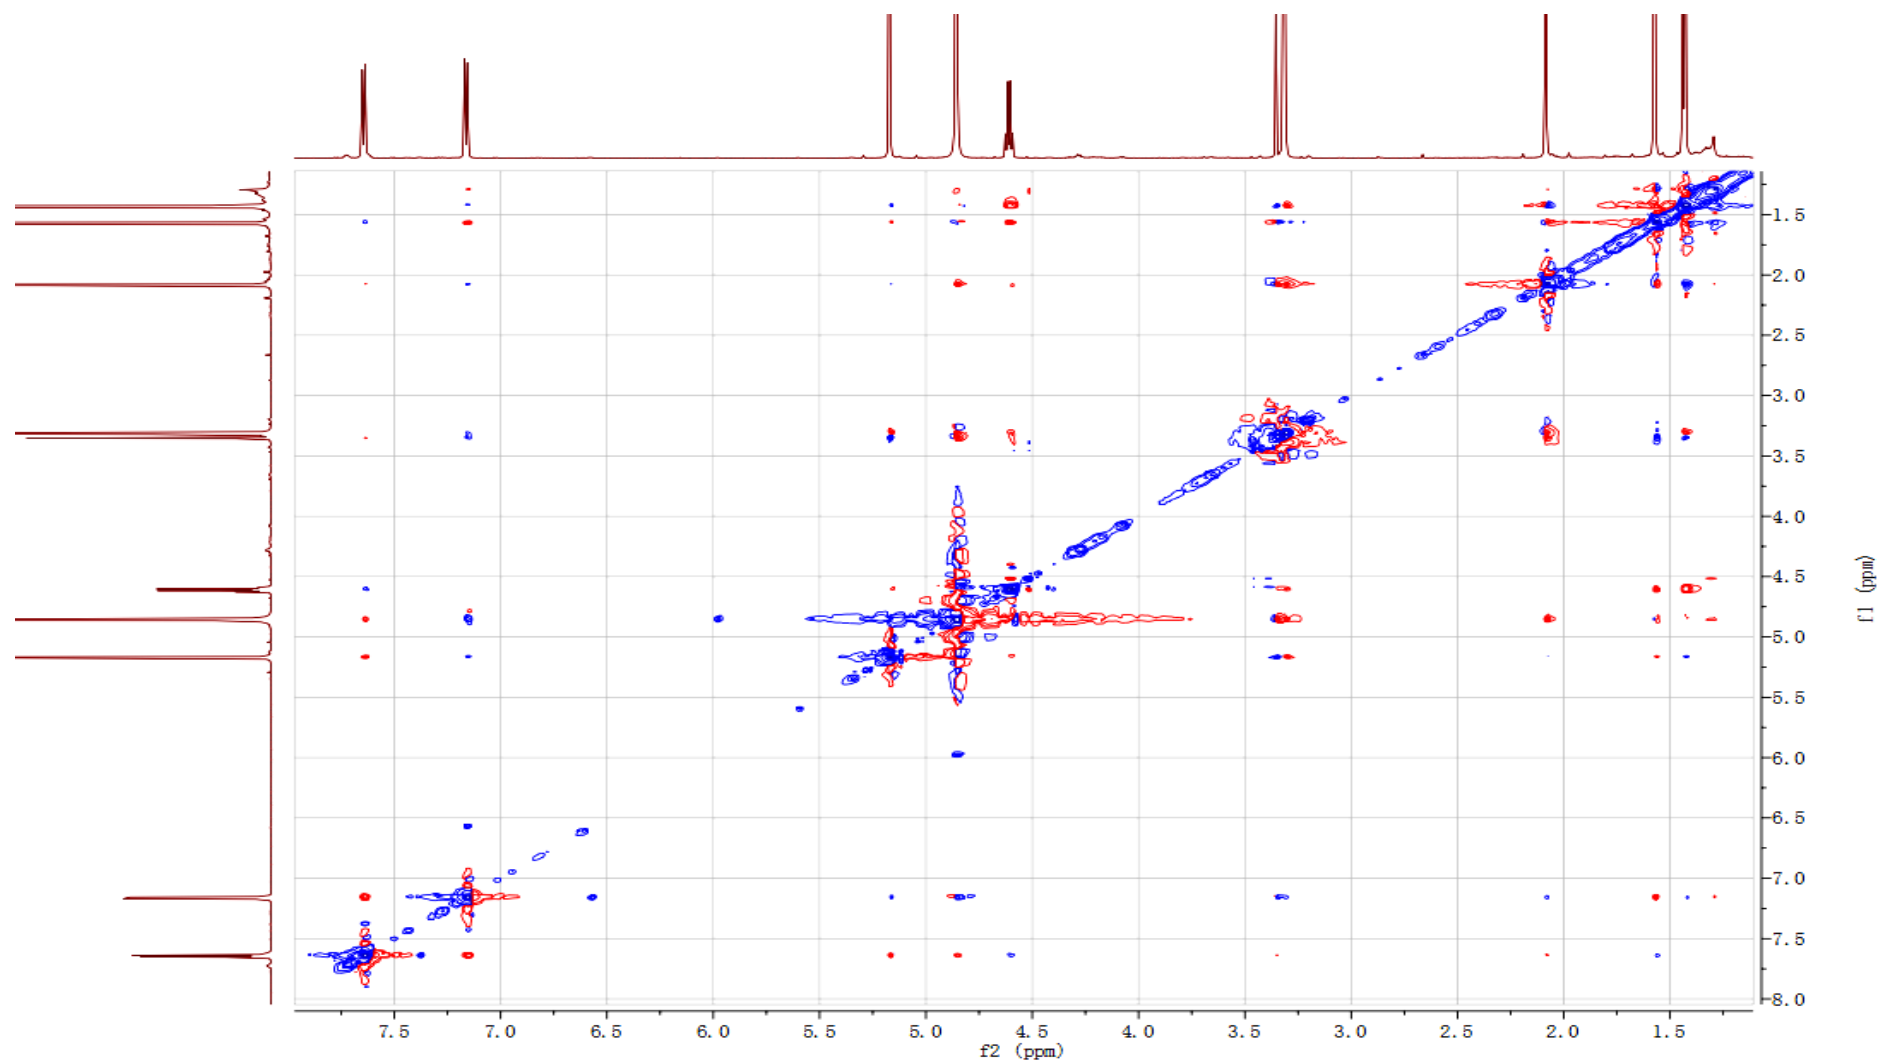

Figure S16. NOESY spectrum of new compound 2



## Mass Spectrum Molecular Formula Report

### Analysis Info

|               |                                                          |                   |                       |
|---------------|----------------------------------------------------------|-------------------|-----------------------|
| Analysis Name | D:\Data\20151216CEYANG\new folder\NEU-14_1-B,5_01_6260.d | Acquisition Date  | 12/16/2015 3:12:51 PM |
| Method        | 20131026_ceyang.m                                        | Instrument / Ser# | Bruker Customer       |
| Sample Name   | NEU-14                                                   | Operator          | micrOTOF-Q 125        |
| Comment       |                                                          |                   |                       |

### Acquisition Parameter

|             |          |                       |           |                  |           |
|-------------|----------|-----------------------|-----------|------------------|-----------|
| Source Type | ESI      | Ion Polarity          | Positive  | Set Nebulizer    | 1.2 Bar   |
| Focus       | Active   | Set Capillary         | 4500 V    | Set Dry Heater   | 180 °C    |
| Scan Begin  | 50 m/z   | Set End Plate Offset  | -500 V    | Set Dry Gas      | 8.0 l/min |
| Scan End    | 3000 m/z | Set Collision Cell RF | 100.0 Vpp | Set Divert Valve | Source    |

### Generate Molecular Formula Parameter

|                  |                        |         |
|------------------|------------------------|---------|
| Formula, min.    |                        |         |
| Formula, max.    |                        |         |
| Measured m/z     | Tolerance              | Charge  |
| Check Valence    | Minimum                | Maximum |
| Nitrogen Rule    | Electron Configuration |         |
| Filter H/C Ratio | Minimum                | Maximum |
| Estimate Carbon  |                        |         |

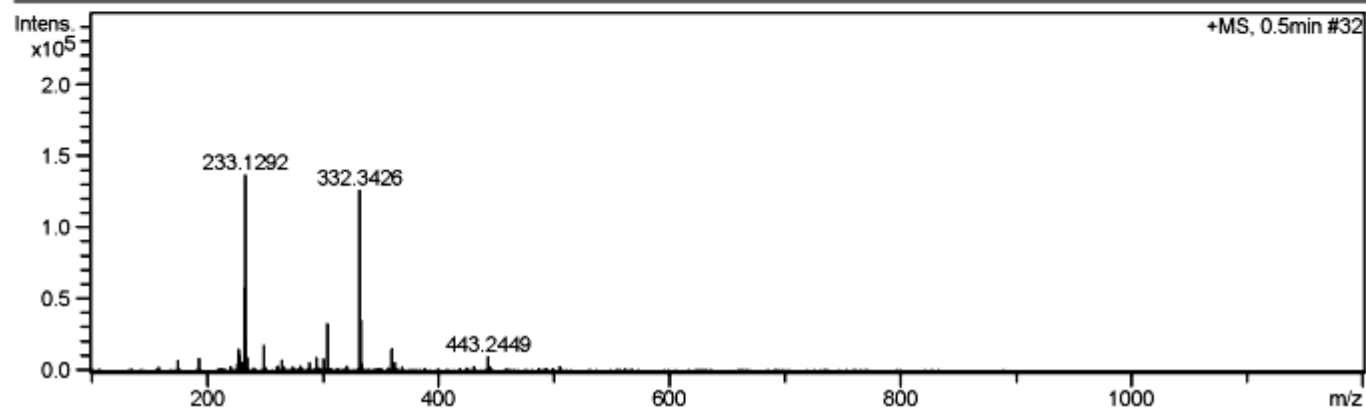

Figure S17. HRESI-MS spectrum of new compound 4

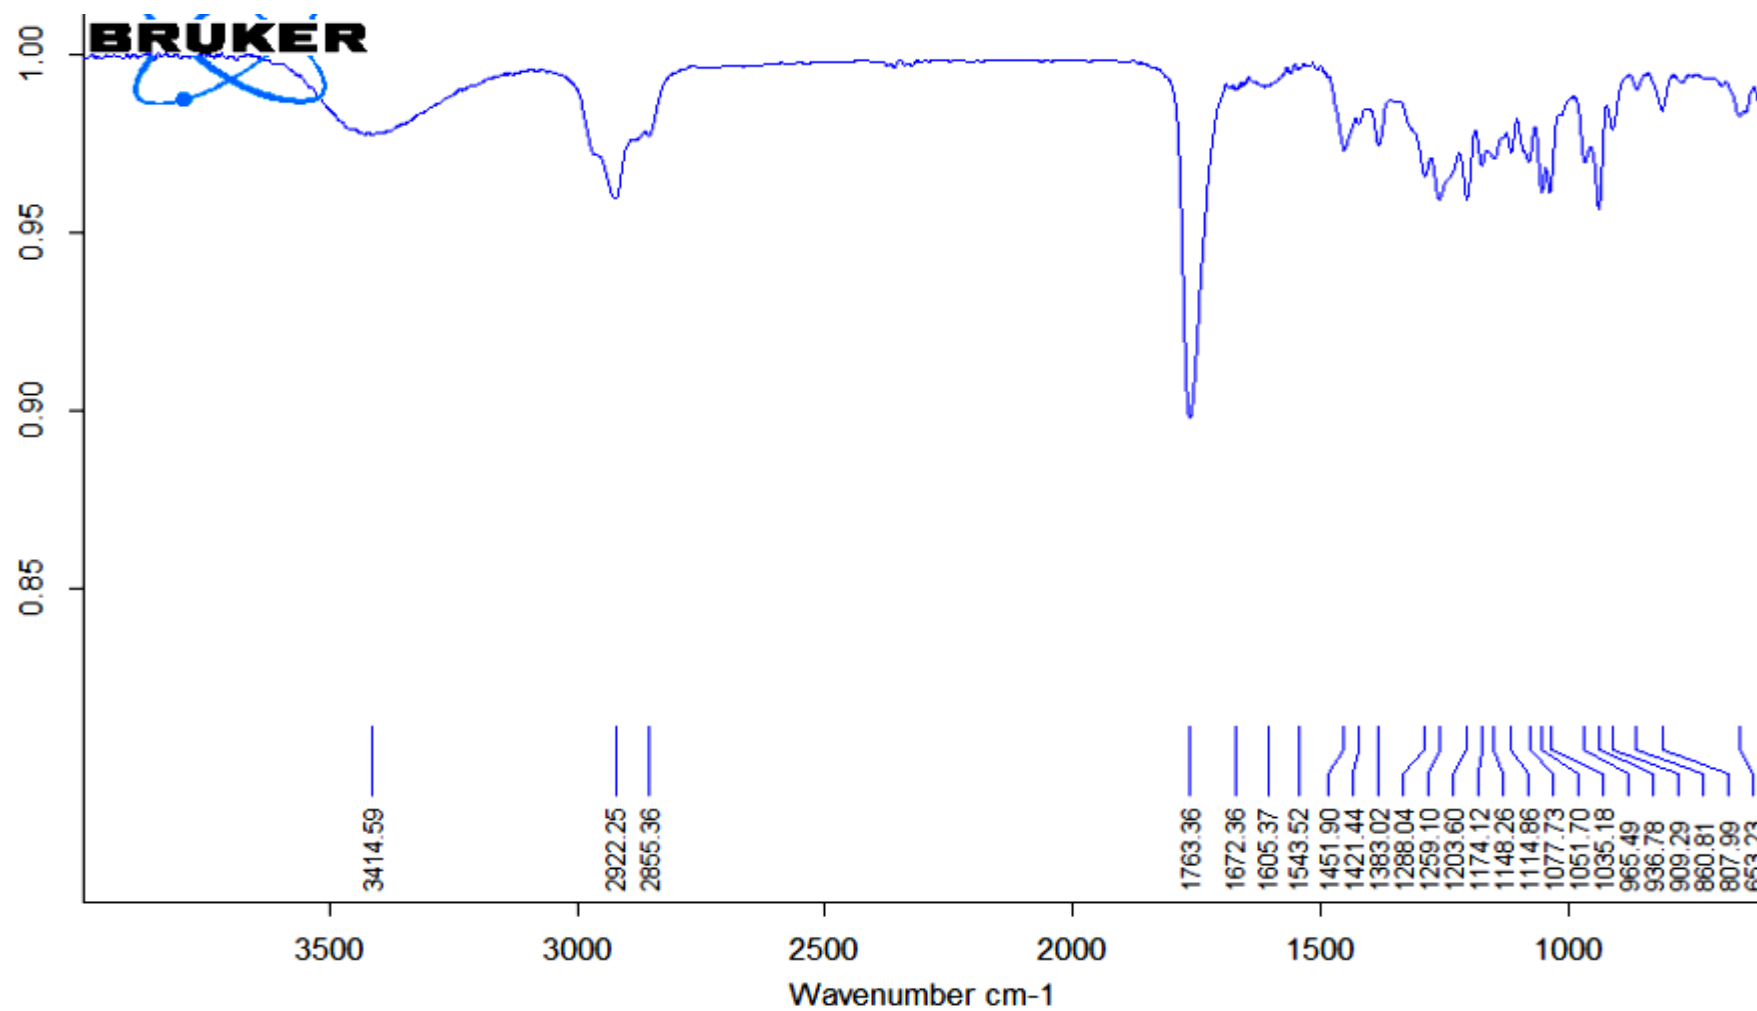

Figure S18. IR spectrum of new compound 4

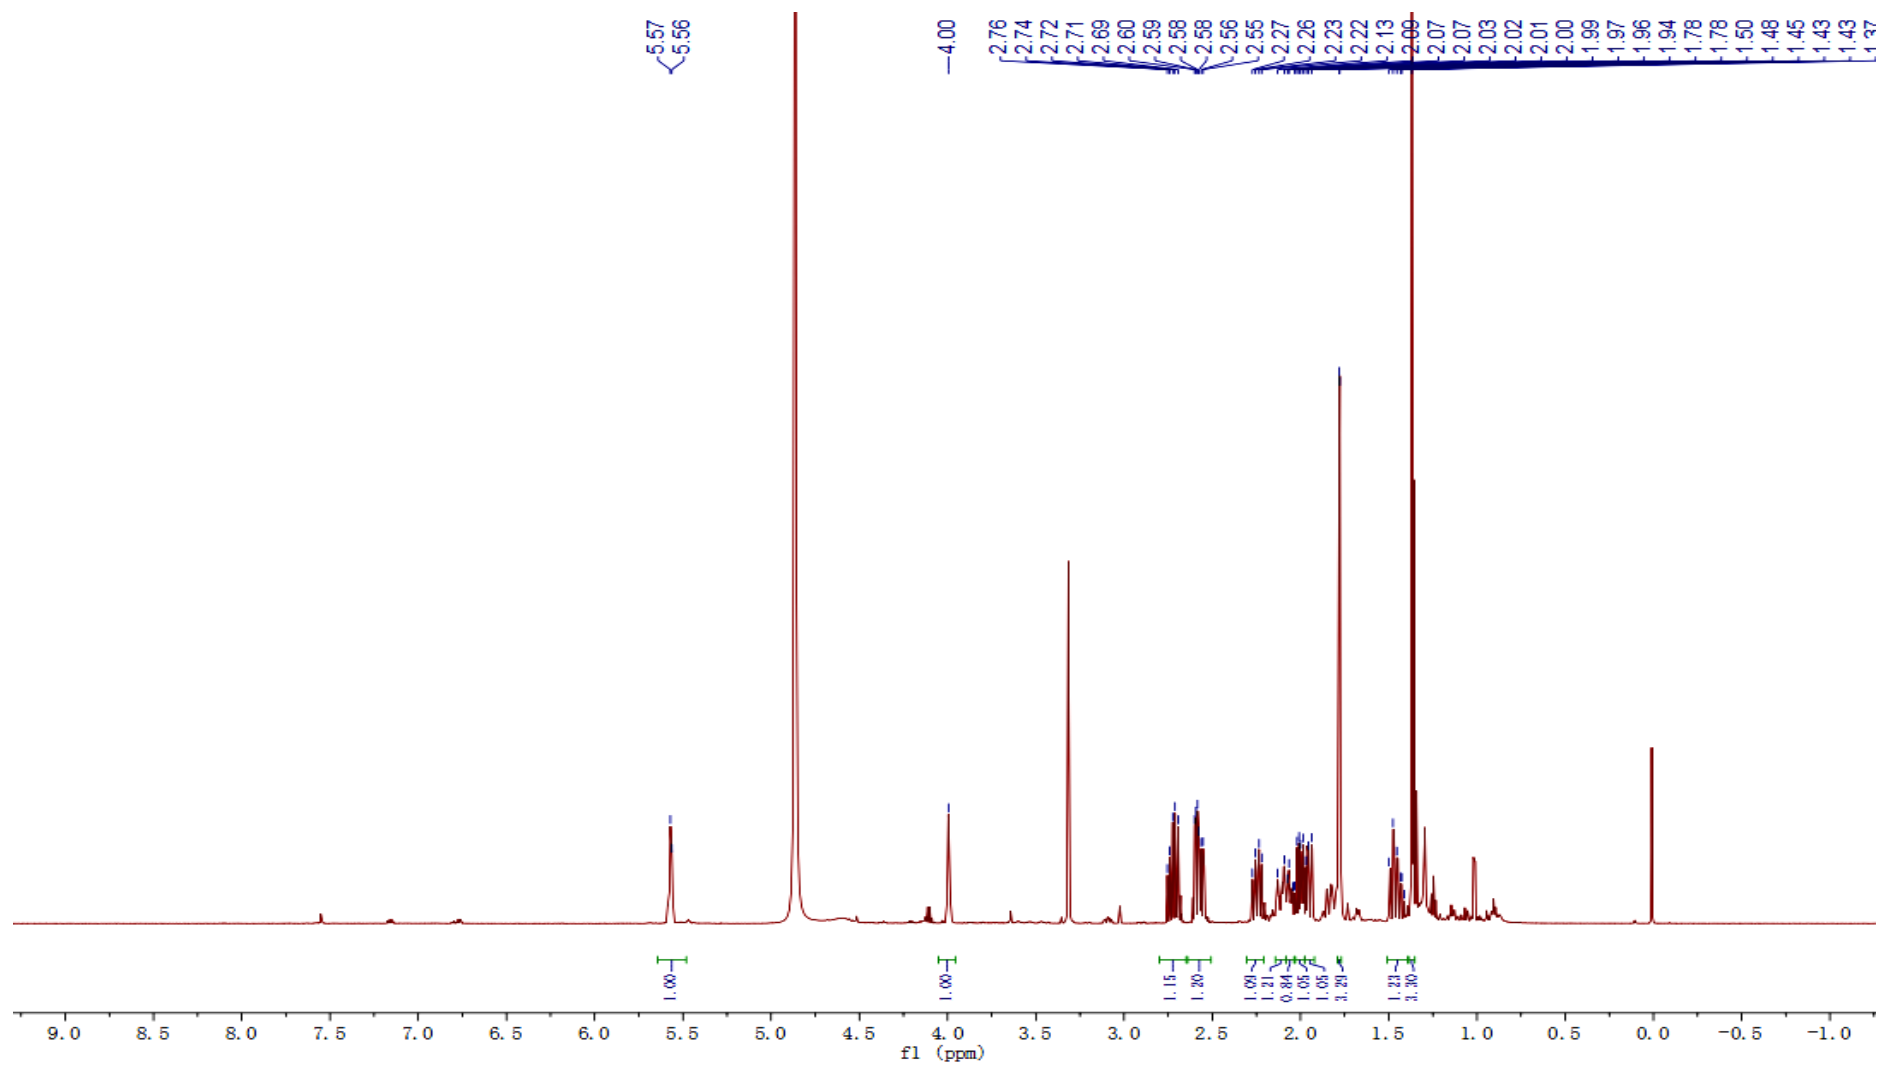

Figure S19. <sup>1</sup>H NMR (600 MHz, CD<sub>3</sub>OD) spectrum of new compound 4

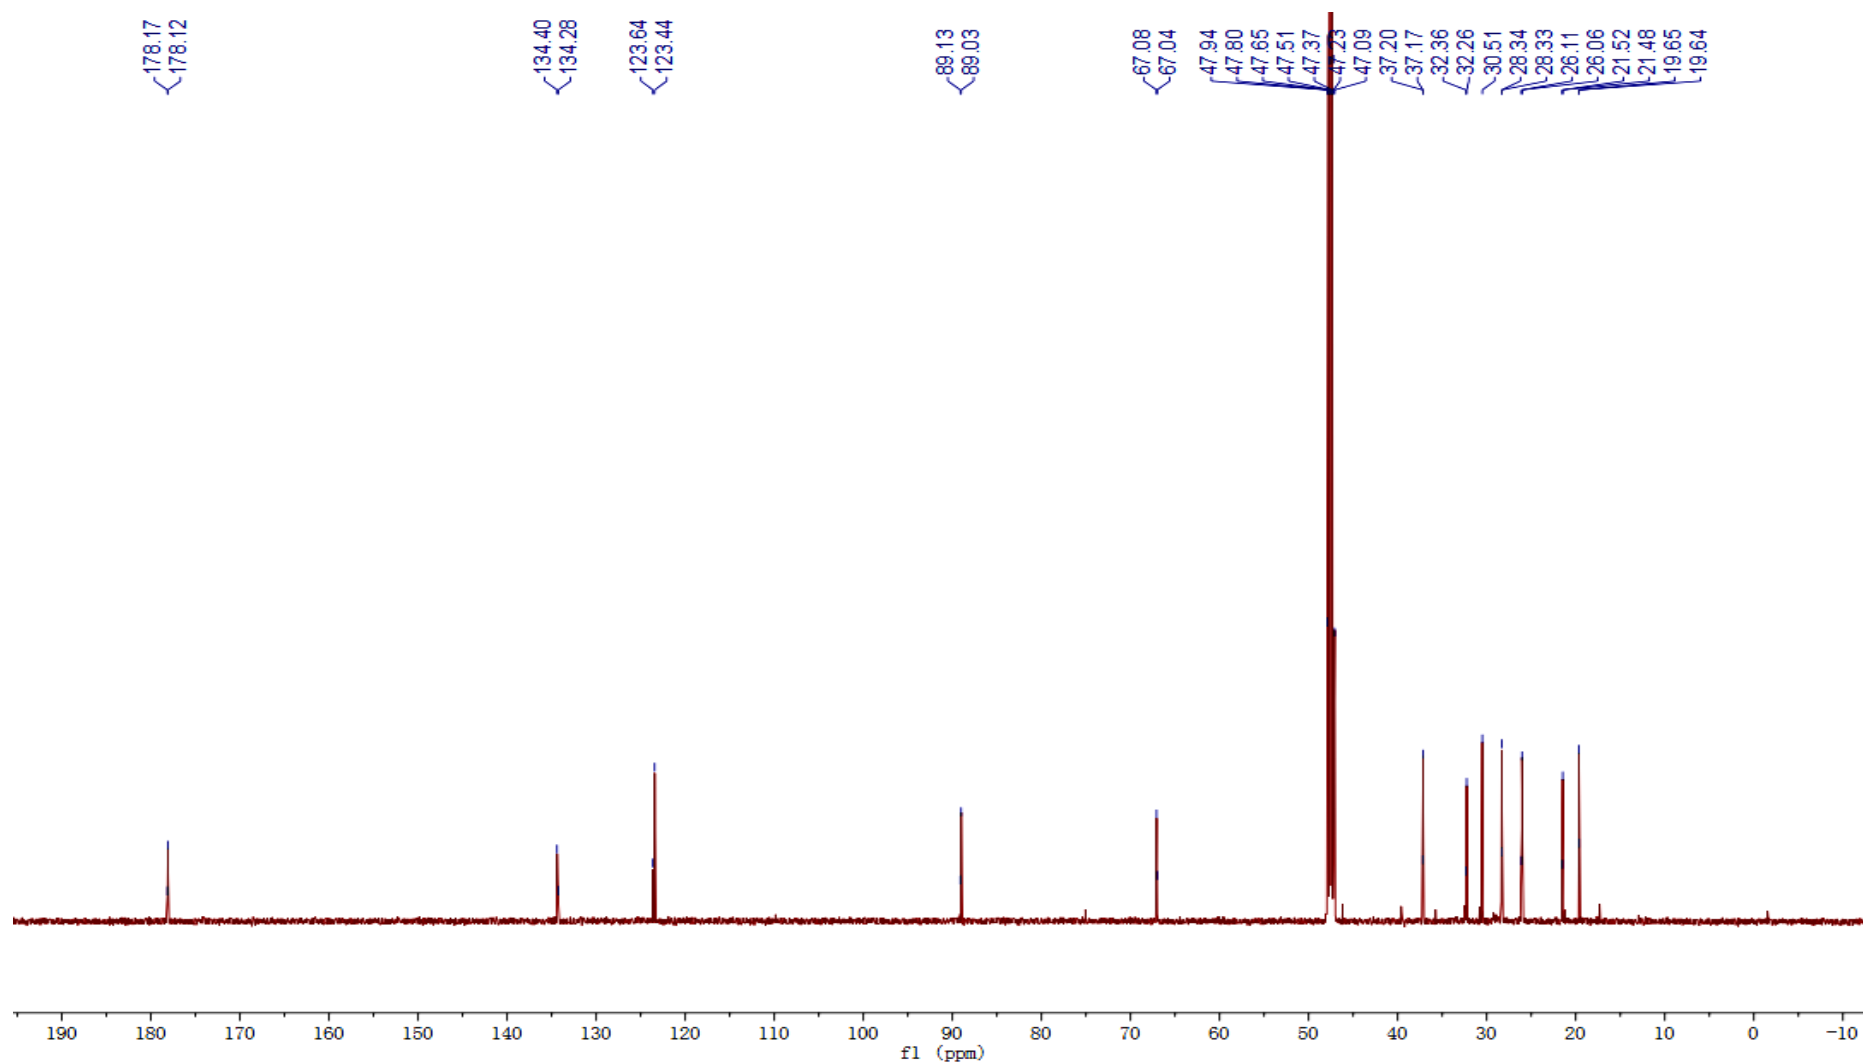

Figure S20. <sup>13</sup>C NMR (150 MHz, CD<sub>3</sub>OD) spectrum of new compound 4

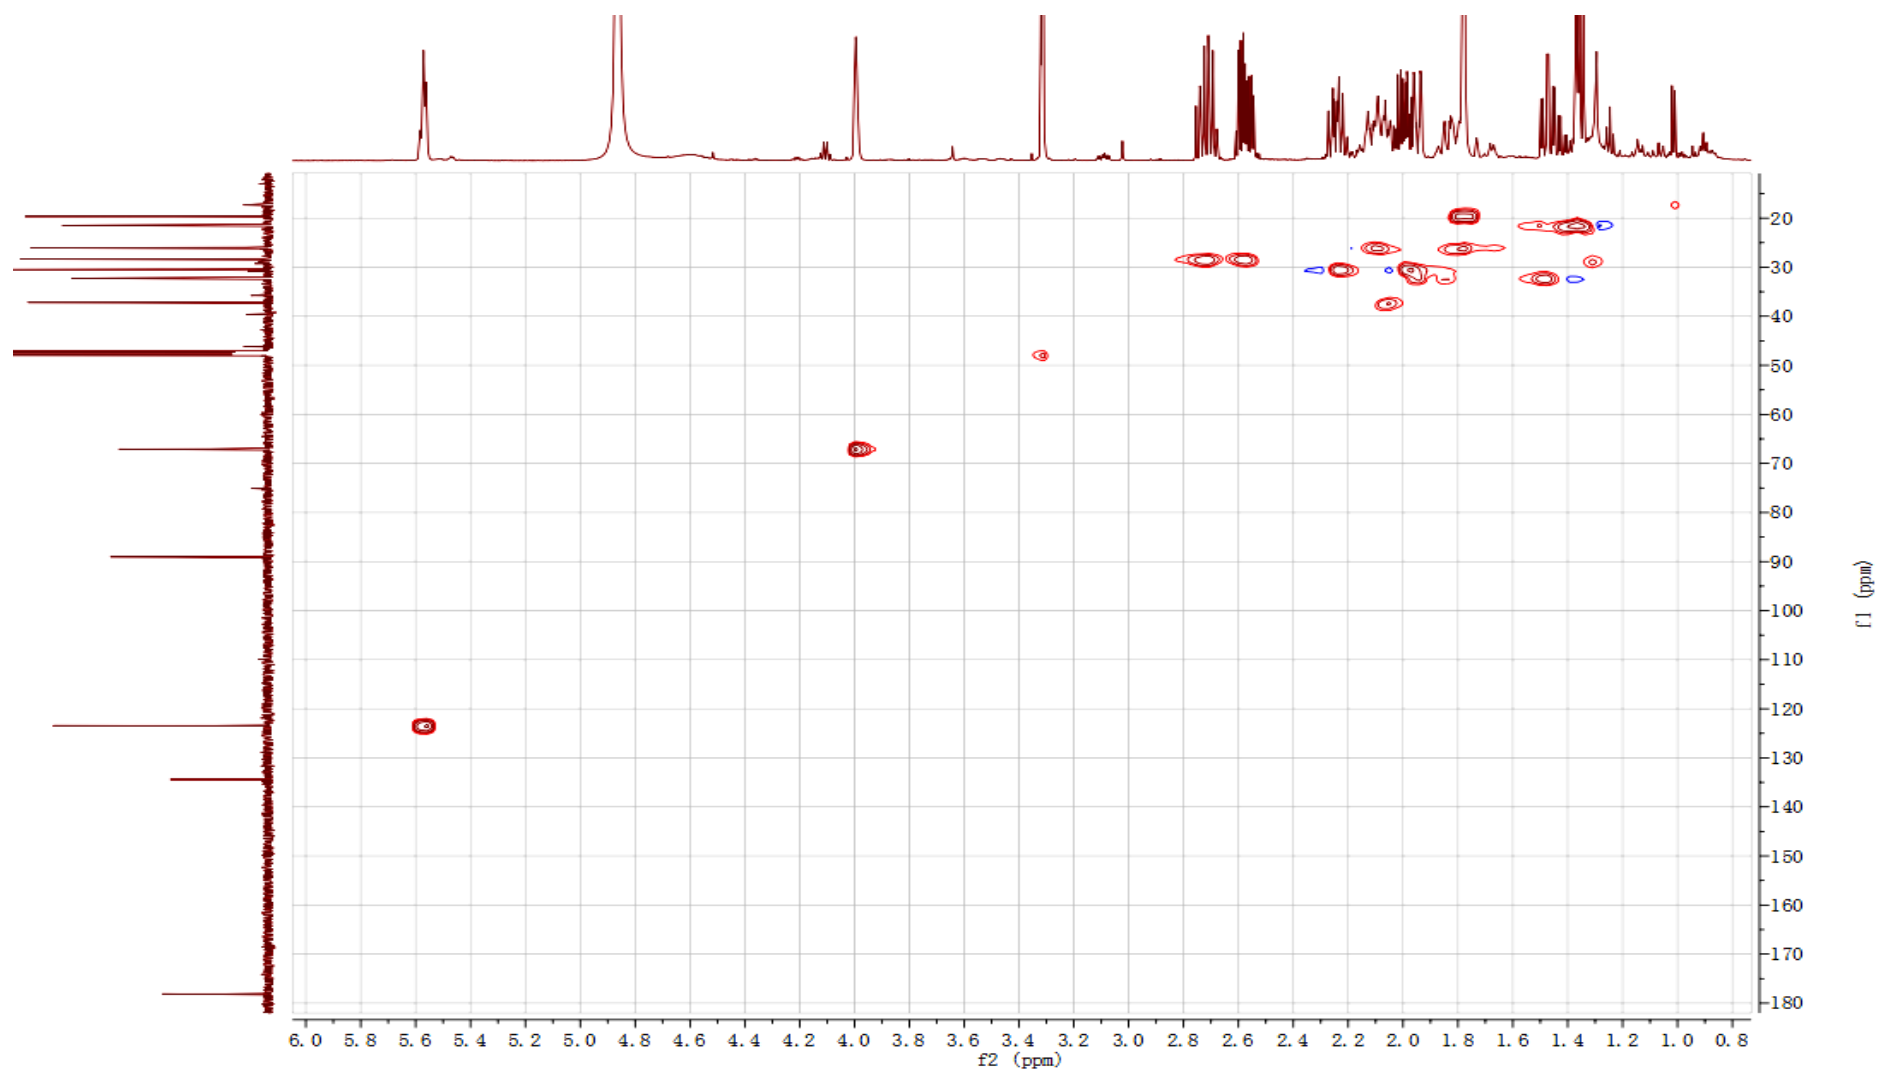

Figure S21. HSQC spectrum of new compound 4

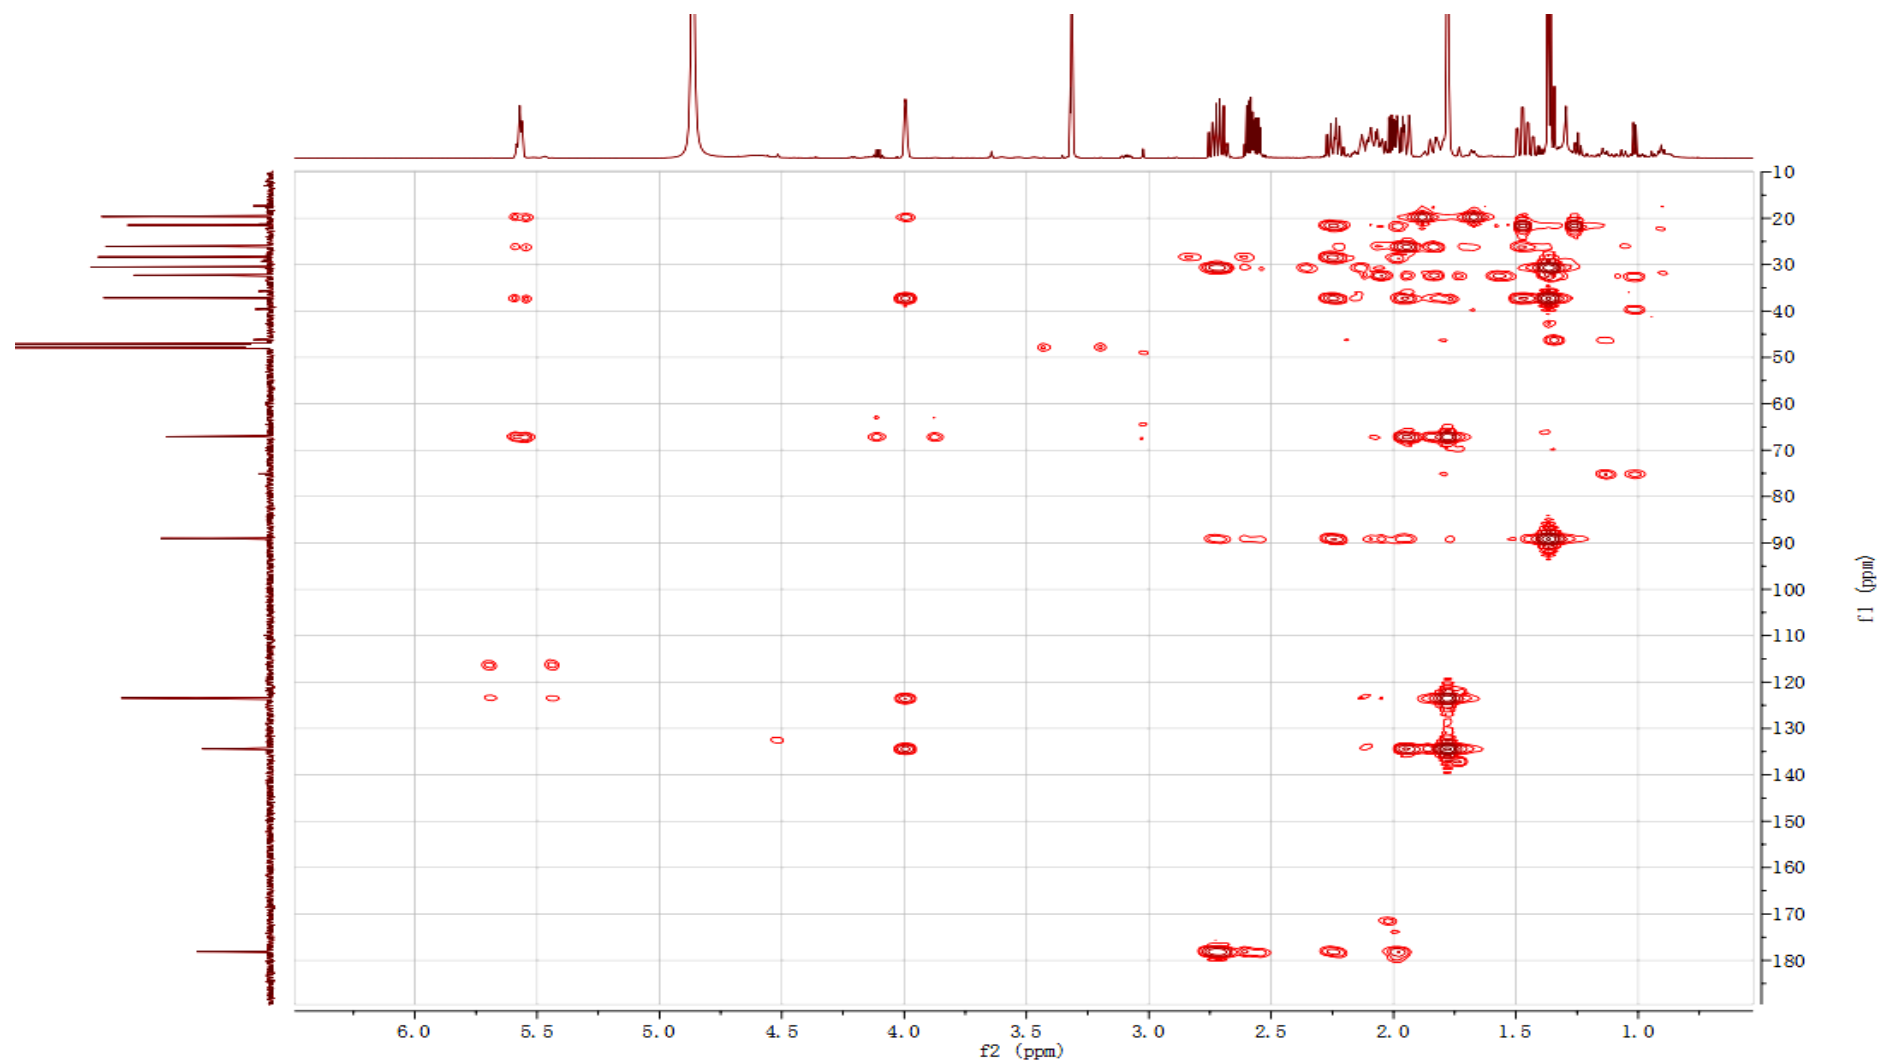

Figure S22. HMBC spectrum of new compound 4

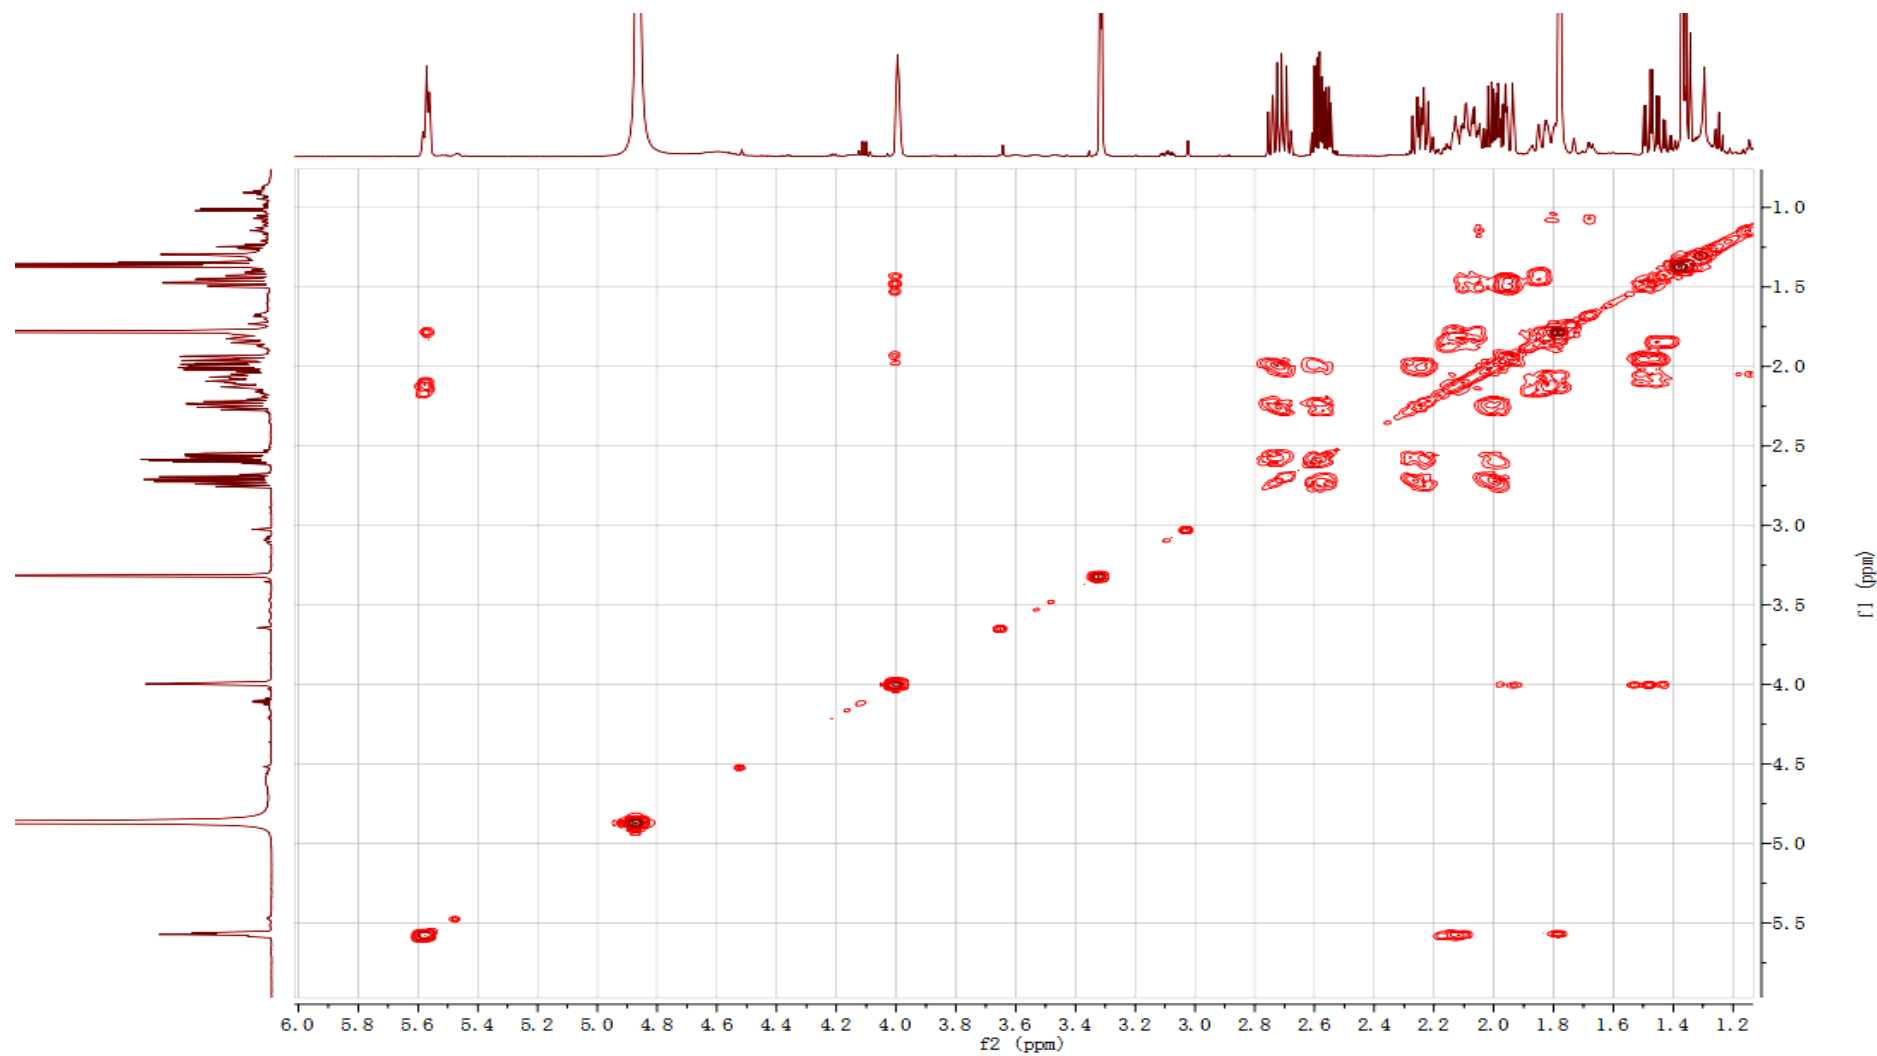

Figure S23. COSY spectrum of new compound 4

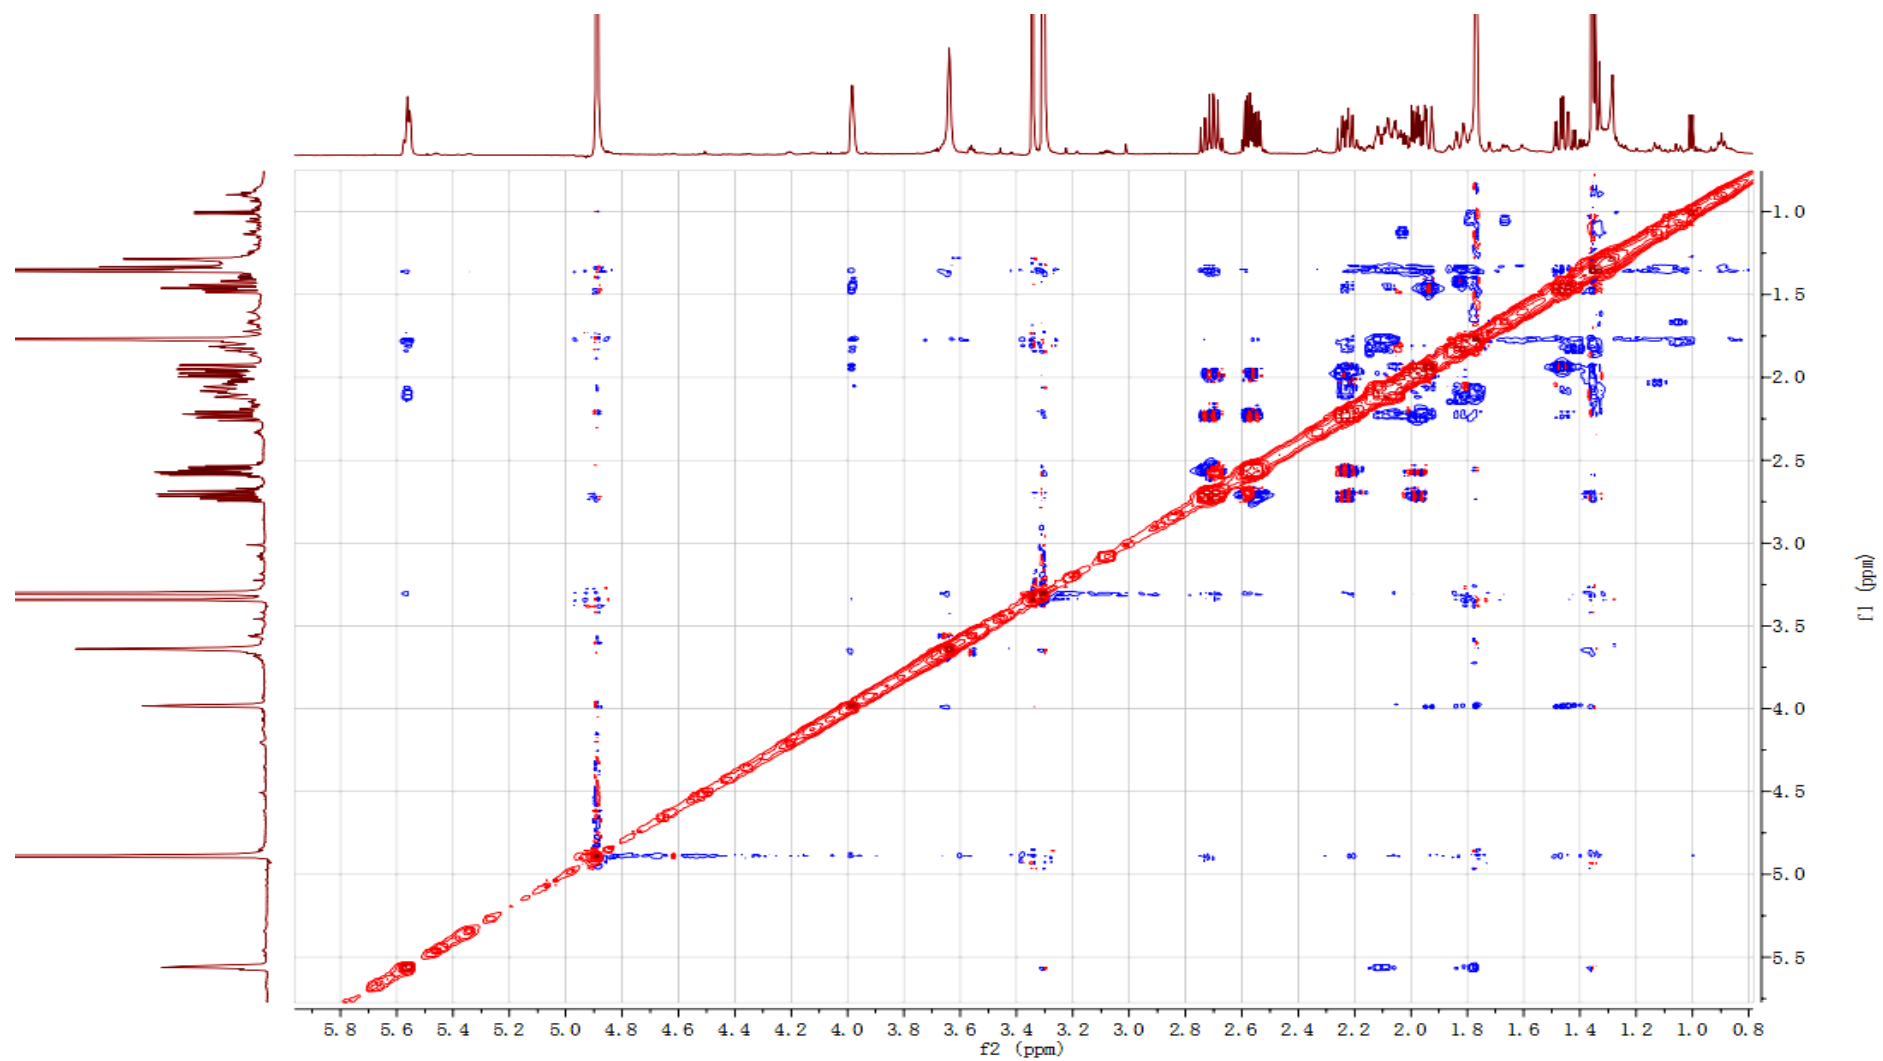

Figure S24. NOESY spectrum of new compound 4



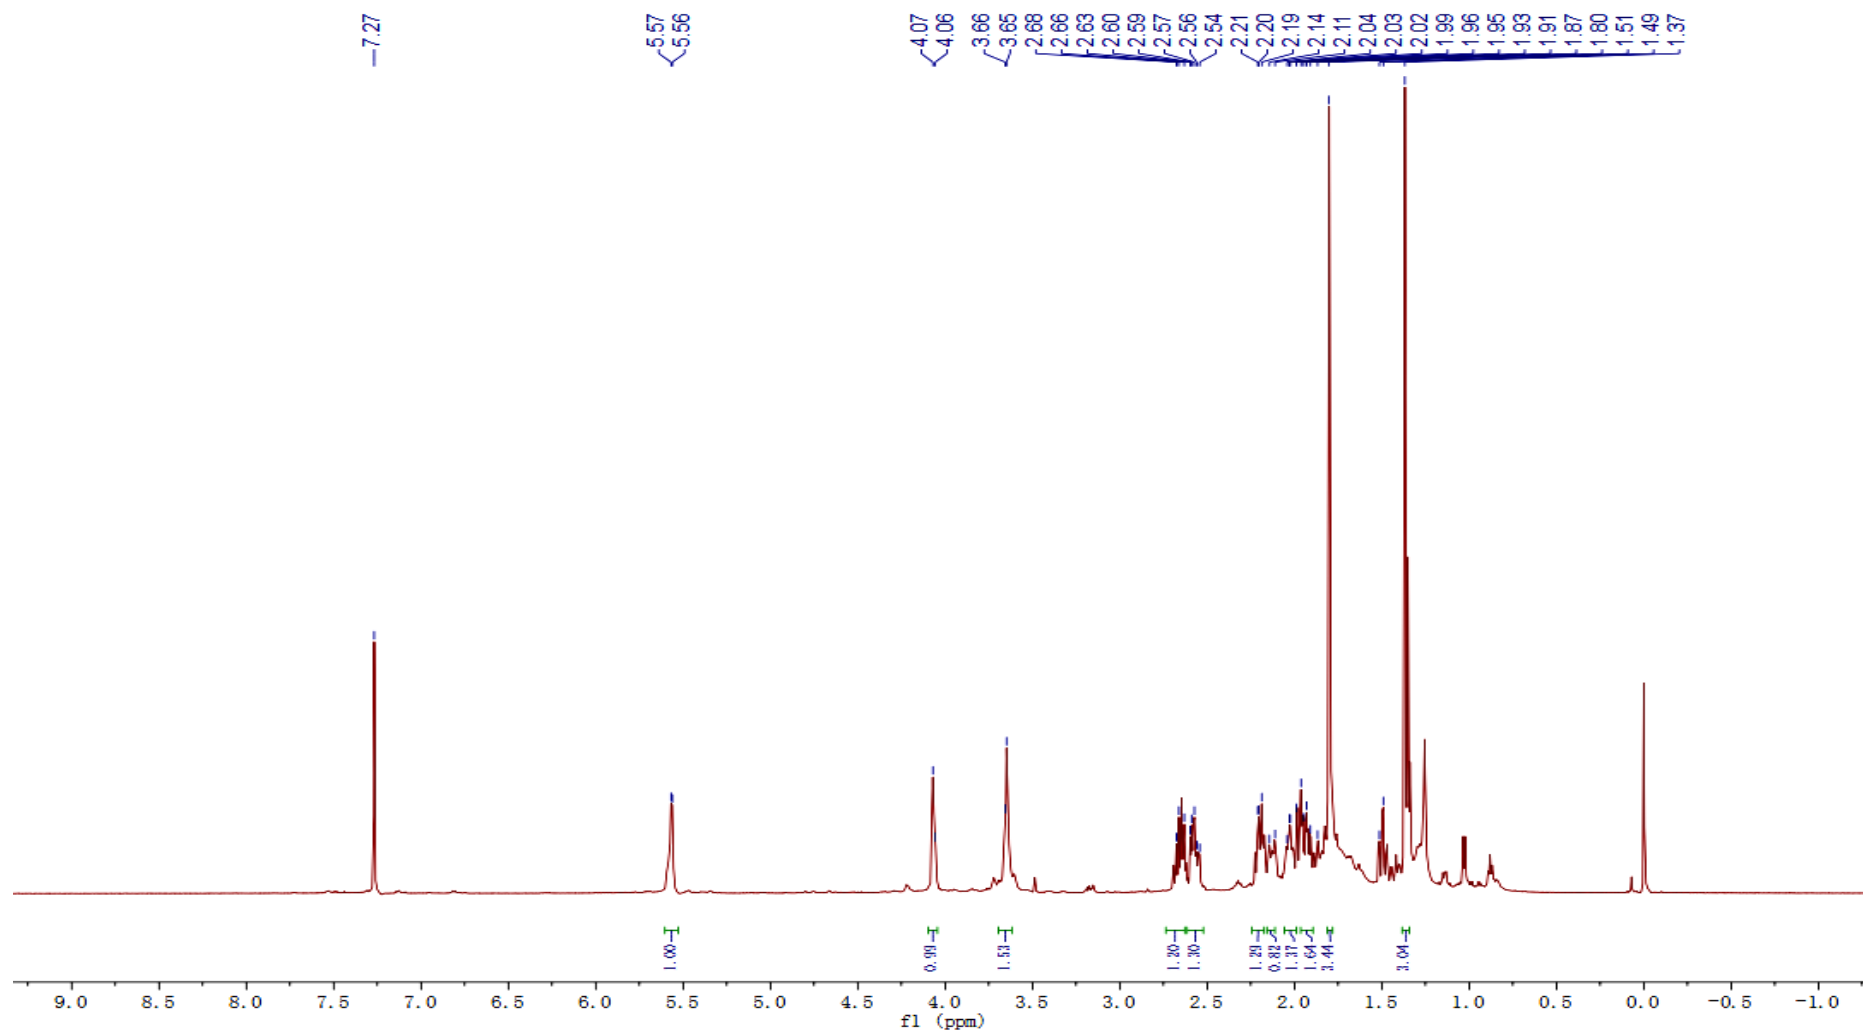

Figure S25. <sup>1</sup>H NMR (600 MHz, CDCl<sub>3</sub>) spectrum of new compound 4

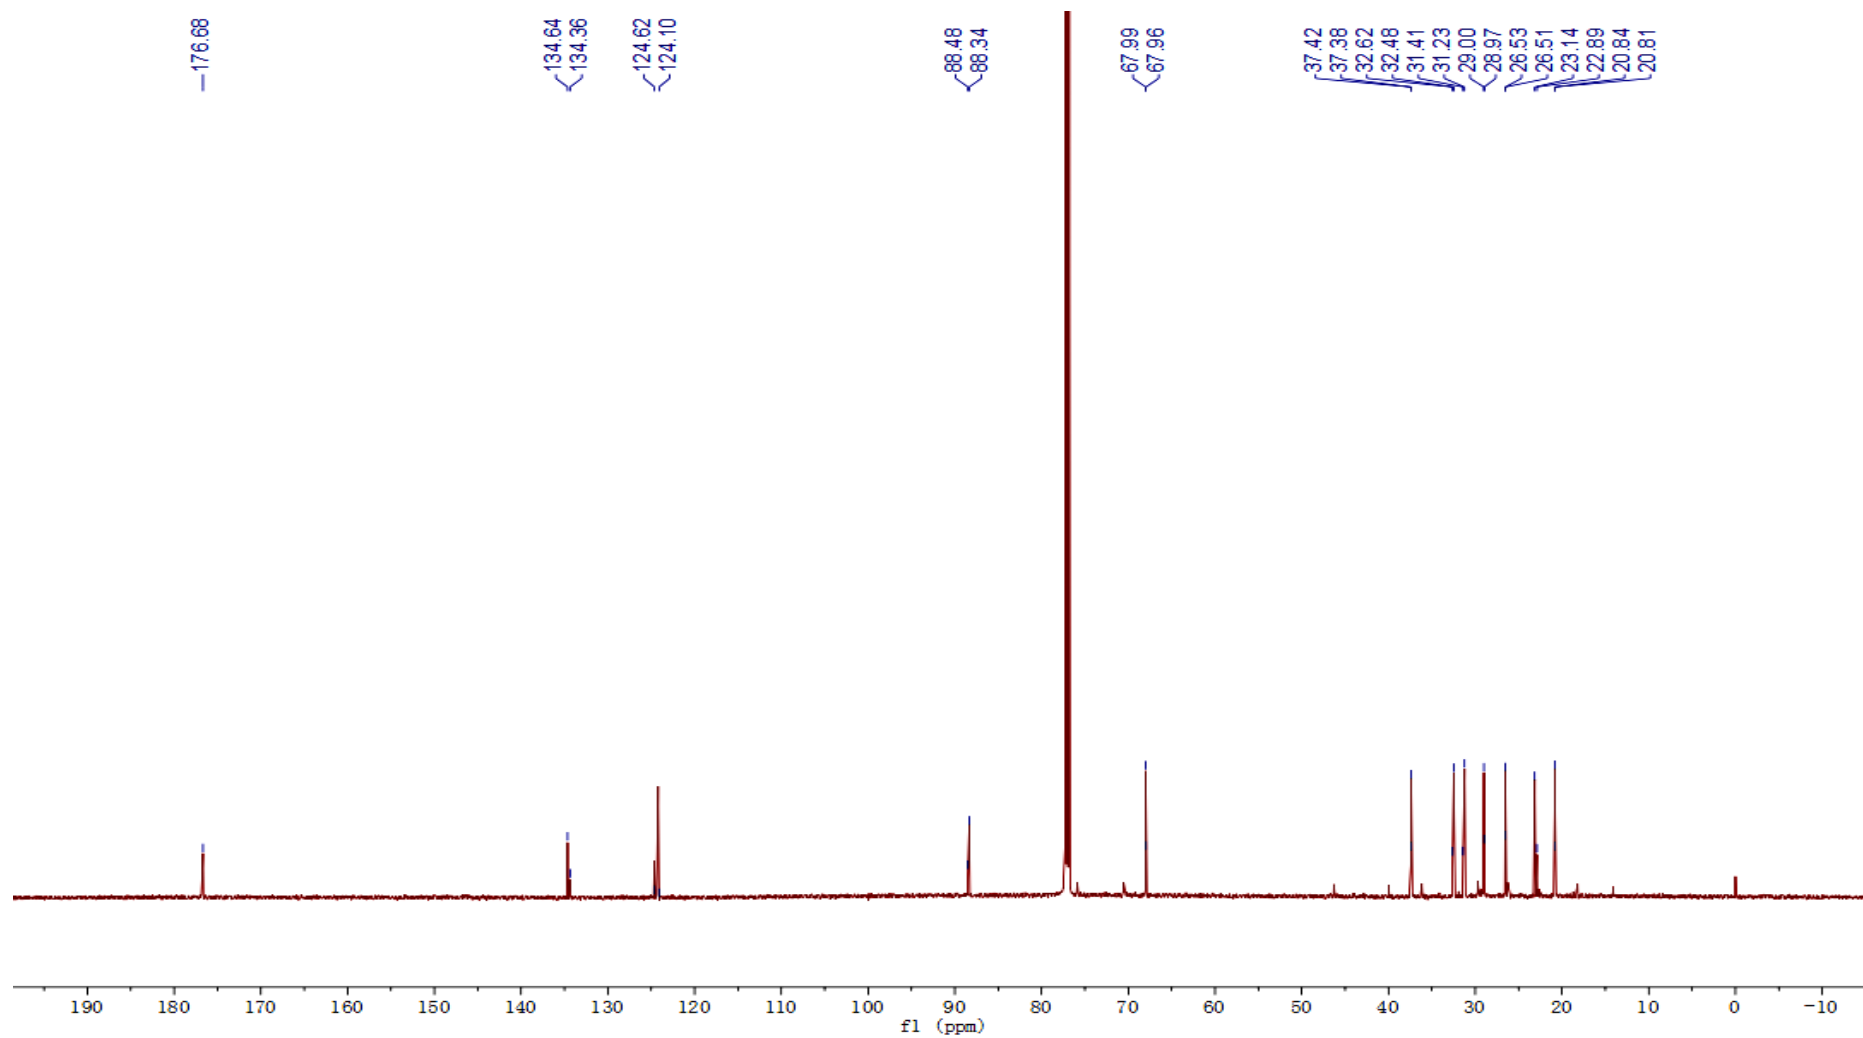

Figure S26. <sup>13</sup>C NMR (150 MHz, CDCl<sub>3</sub>) spectrum of new compound 4

## Mass Spectrum Molecular Formula Report

### Analysis Info

|               |                                                          |                   |                       |
|---------------|----------------------------------------------------------|-------------------|-----------------------|
| Analysis Name | D:\Data\20151216CEYANG\new folder\NEU-15_1-B,6_01_6261.d | Acquisition Date  | 12/16/2015 3:17:01 PM |
| Method        | 20131026_ceyang.m                                        | Instrument / Ser# | Bruker Customer       |
| Sample Name   | NEU-15                                                   | Operator          | micrOTOF-Q 125        |
| Comment       |                                                          |                   |                       |

### Acquisition Parameter

|             |          |                       |           |                  |           |
|-------------|----------|-----------------------|-----------|------------------|-----------|
| Source Type | ESI      | Ion Polarity          | Positive  | Set Nebulizer    | 1.2 Bar   |
| Focus       | Active   | Set Capillary         | 4500 V    | Set Dry Heater   | 180 °C    |
| Scan Begin  | 50 m/z   | Set End Plate Offset  | -500 V    | Set Dry Gas      | 8.0 l/min |
| Scan End    | 3000 m/z | Set Collision Cell RF | 100.0 Vpp | Set Divert Valve | Source    |

### Generate Molecular Formula Parameter

|                  |  |                        |         |
|------------------|--|------------------------|---------|
| Formula, min.    |  | Tolerance              |         |
| Formula, max.    |  | Minimum                | Maximum |
| Measured m/z     |  | Electron Configuration |         |
| Check Valence    |  | Minimum                | Maximum |
| Nitrogen Rule    |  |                        |         |
| Filter H/C Ratio |  |                        |         |
| Estimate Carbon  |  |                        |         |

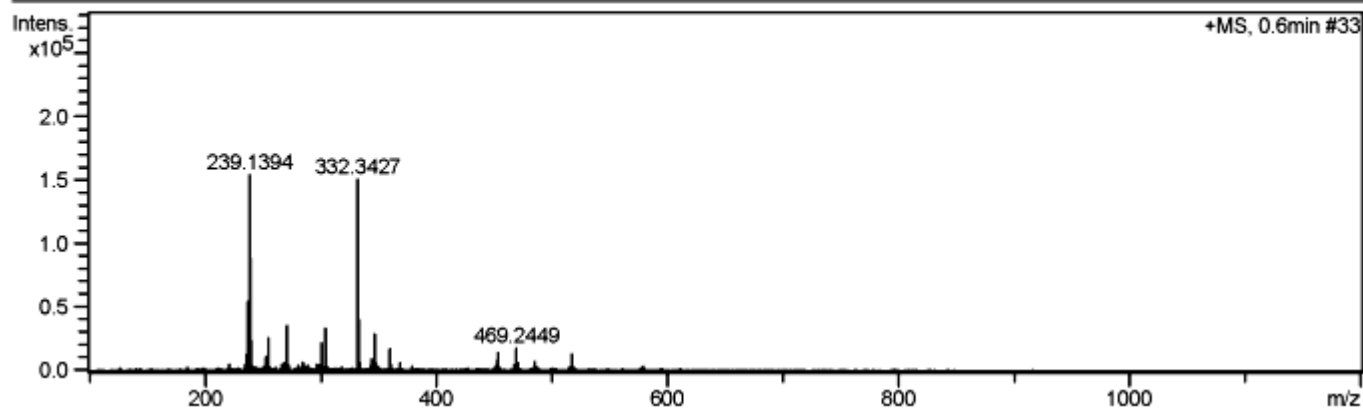

Figure S27. HRESI-MS spectrum of new compound 5

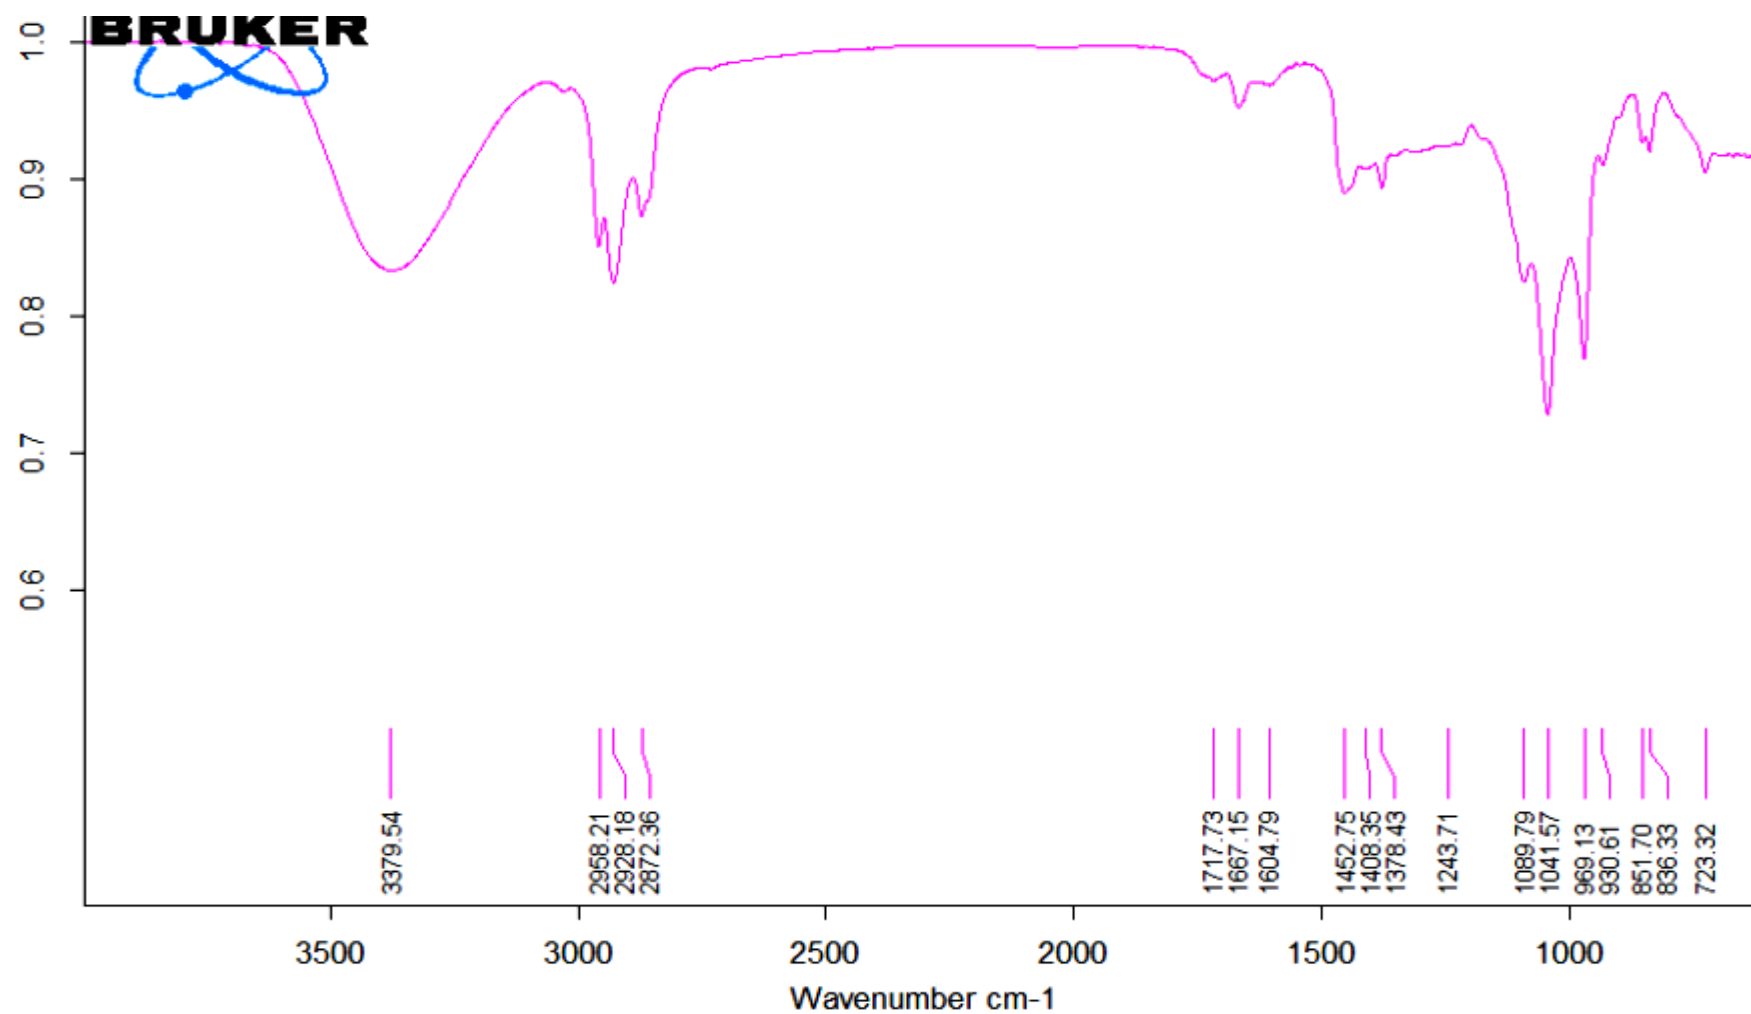

Figure S28. IR spectrum of new compound 5

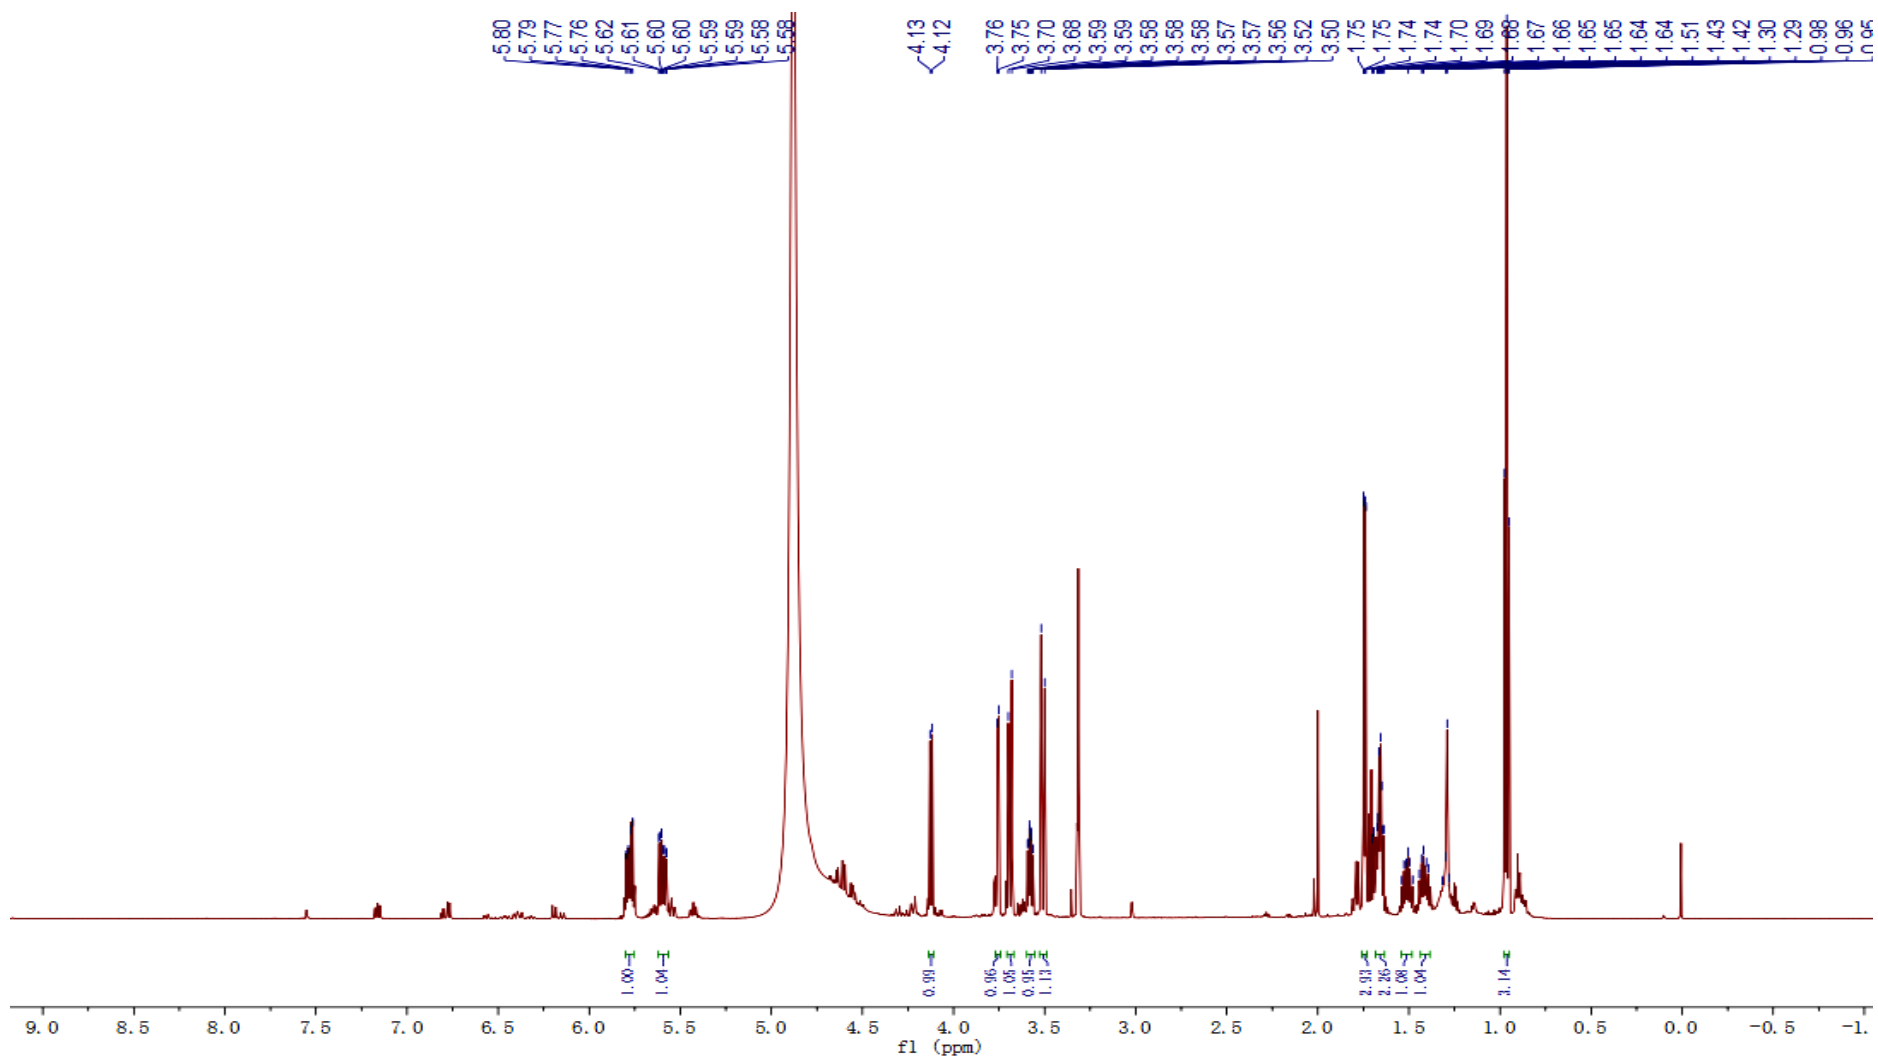

Figure S29. <sup>1</sup>H NMR (600 MHz, CD<sub>3</sub>OD) spectrum of new compound 5

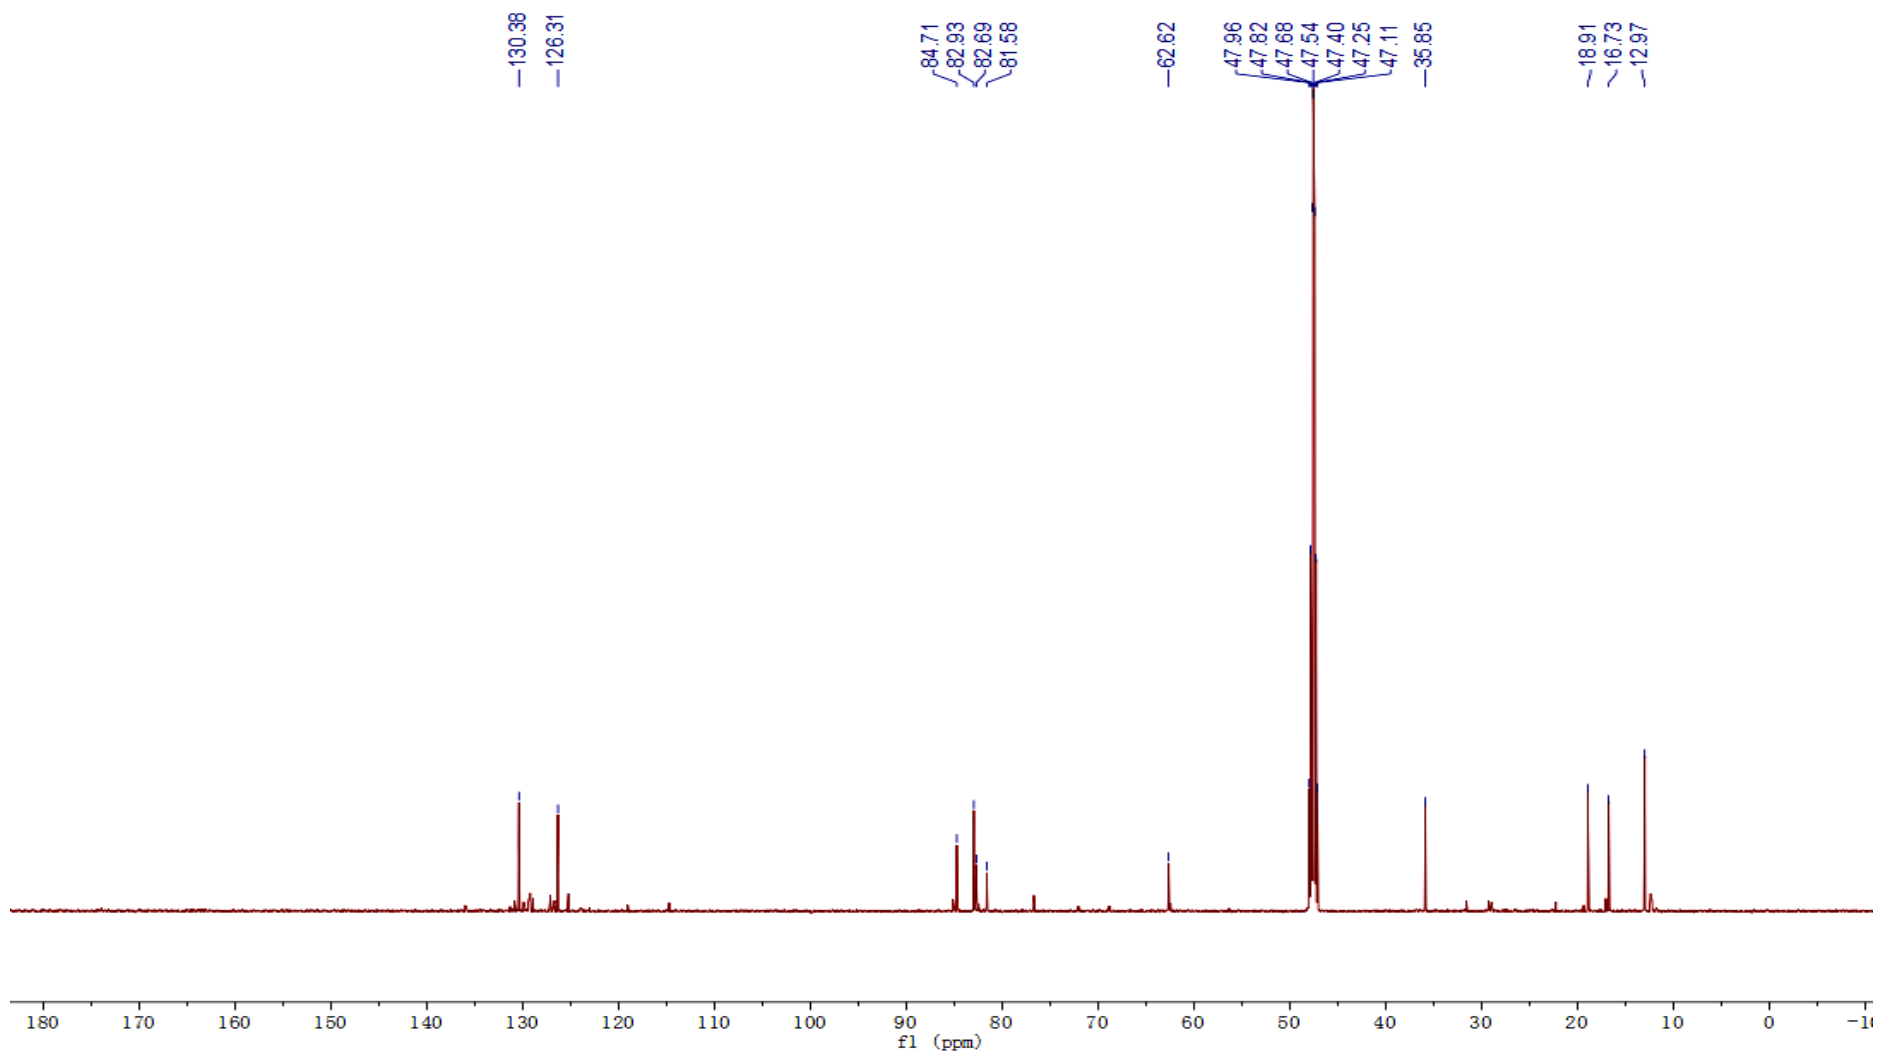

Figure S30.  $^{13}\text{C}$  NMR (150 MHz,  $\text{CD}_3\text{OD}$ ) spectrum of new compound 5

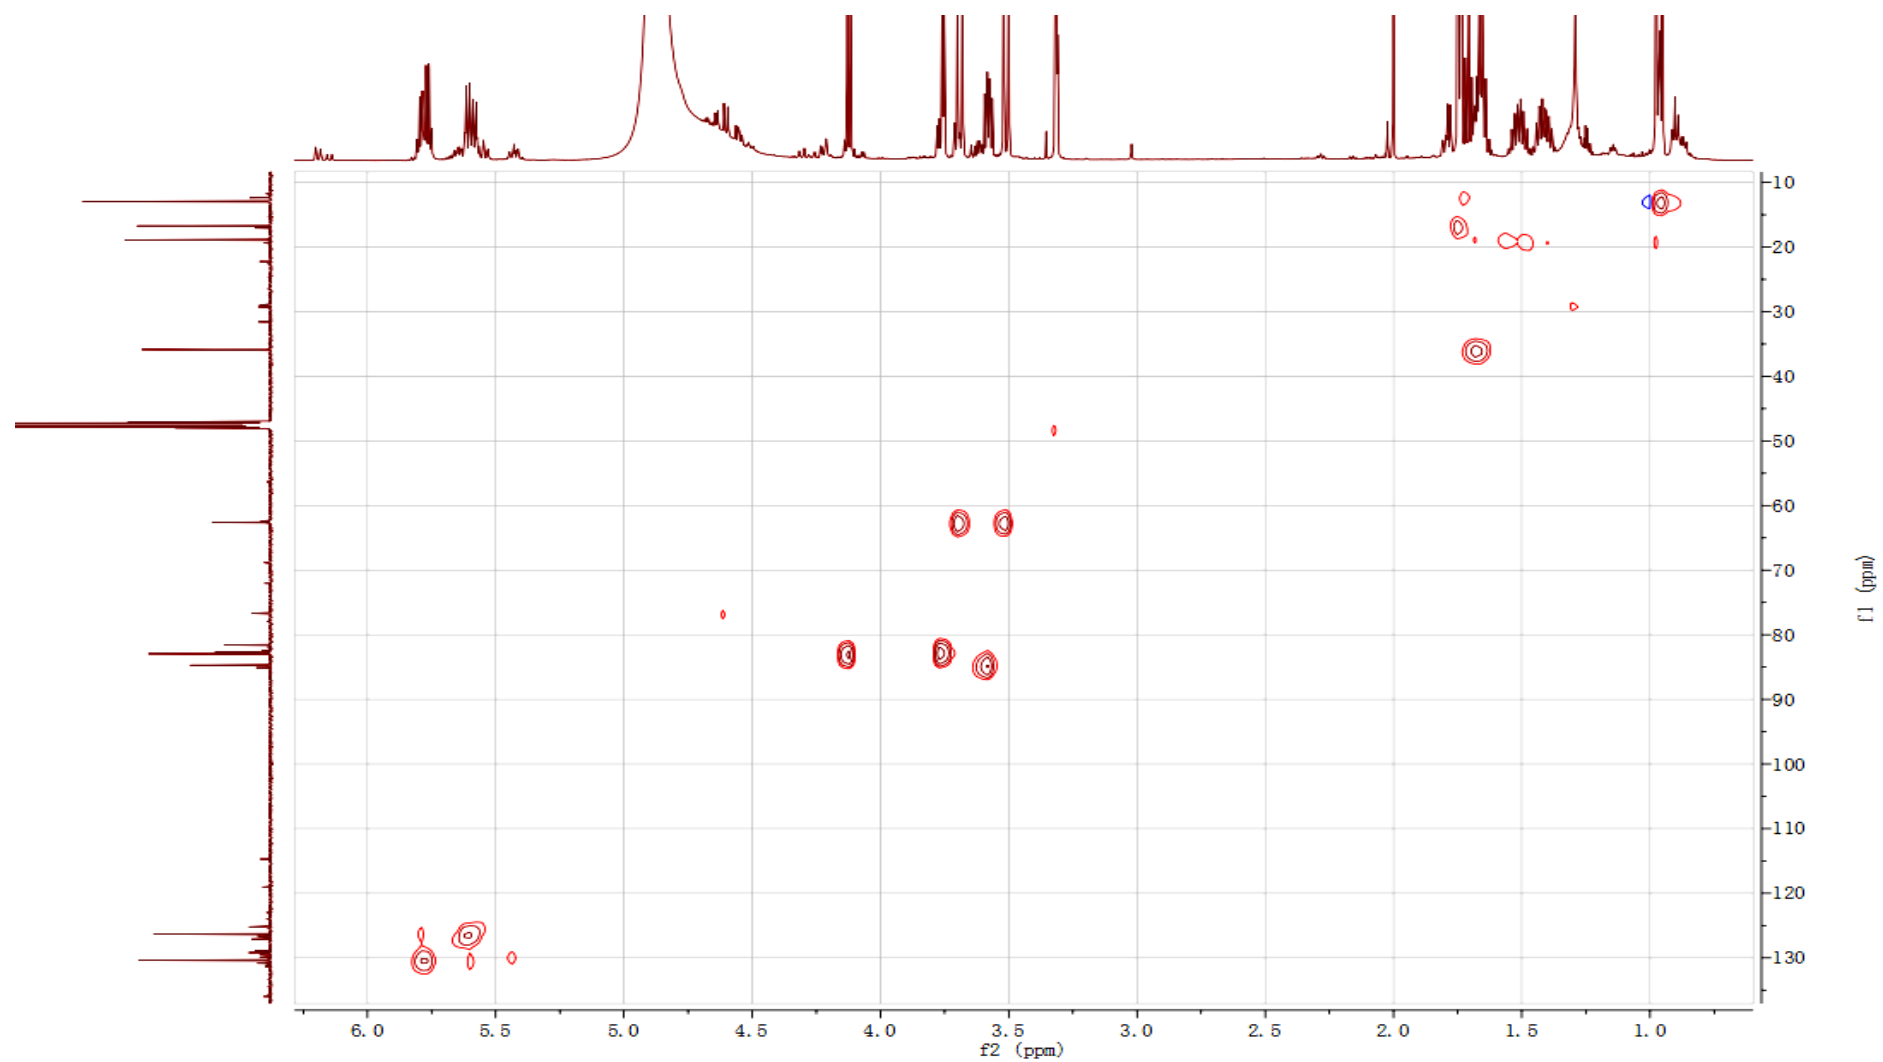

Figure S31. HSQC spectrum of new compound 5

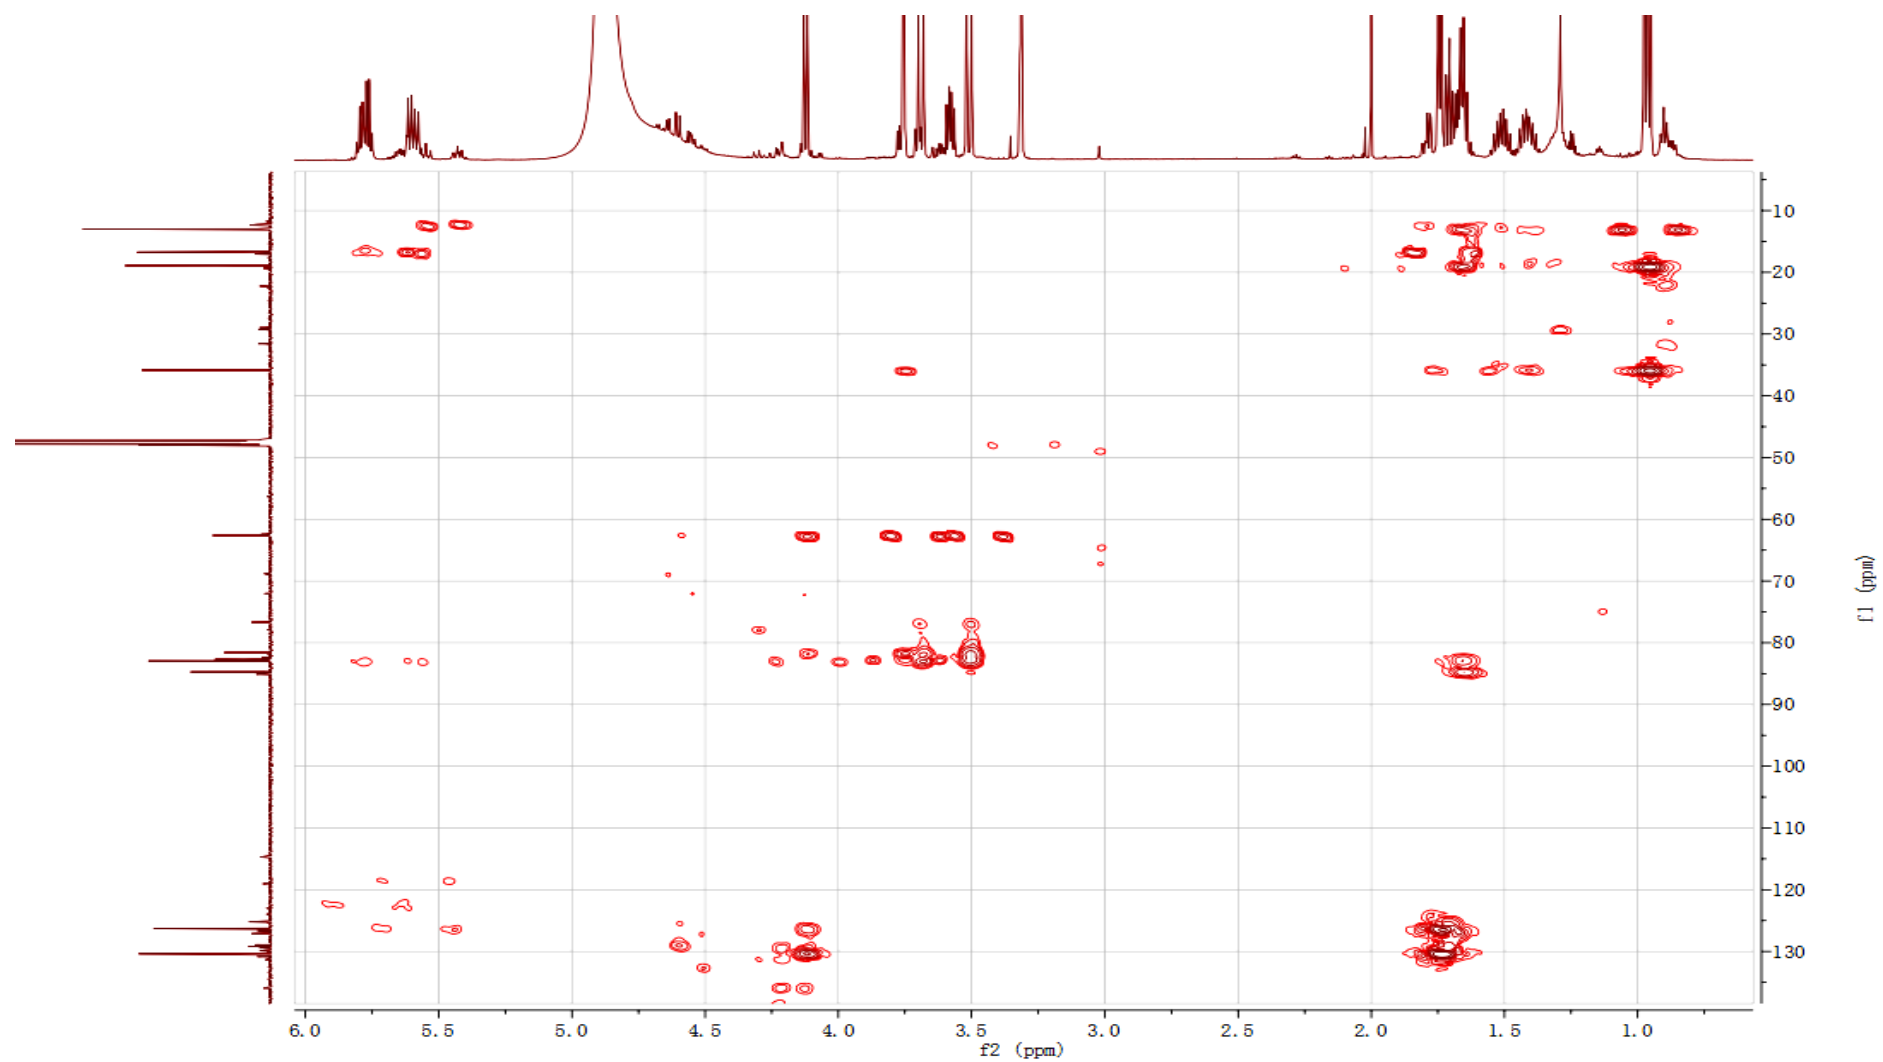

Figure S32. HMBC spectrum of new compound 5



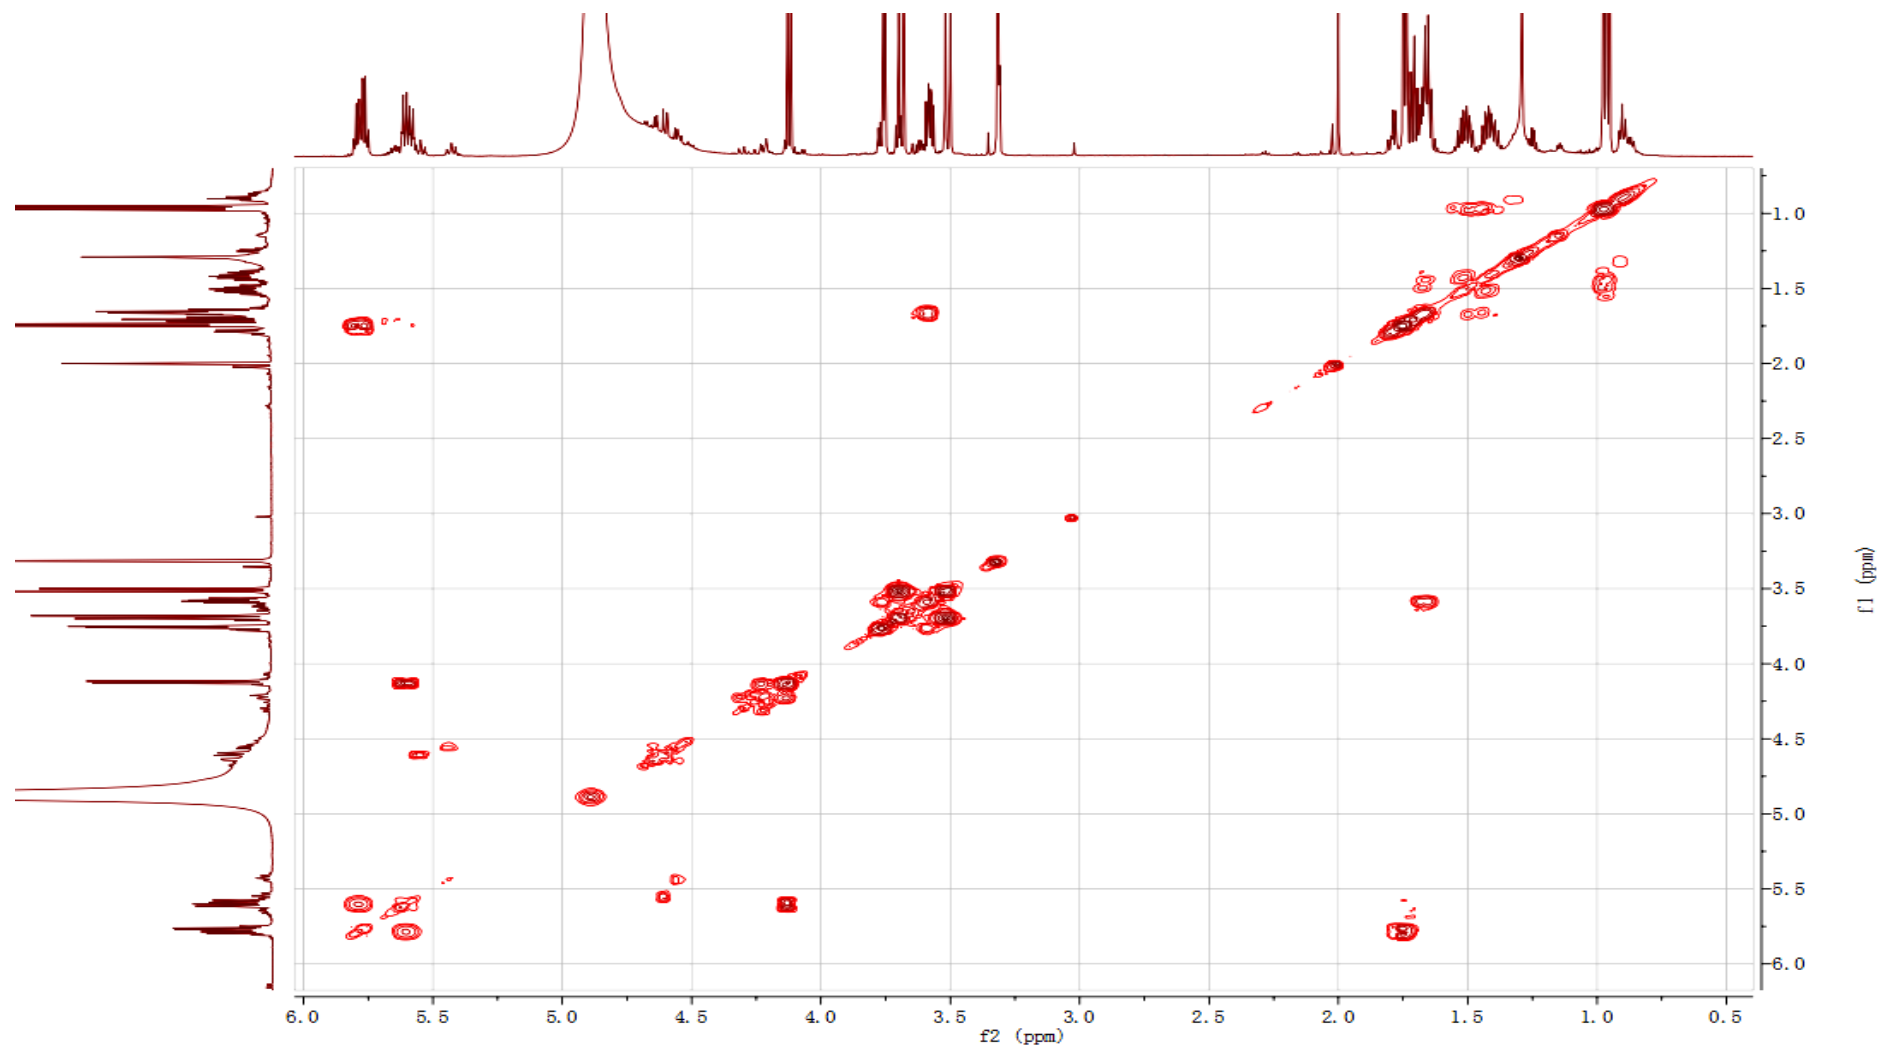

Figure S33. COSY spectrum of new compound 5

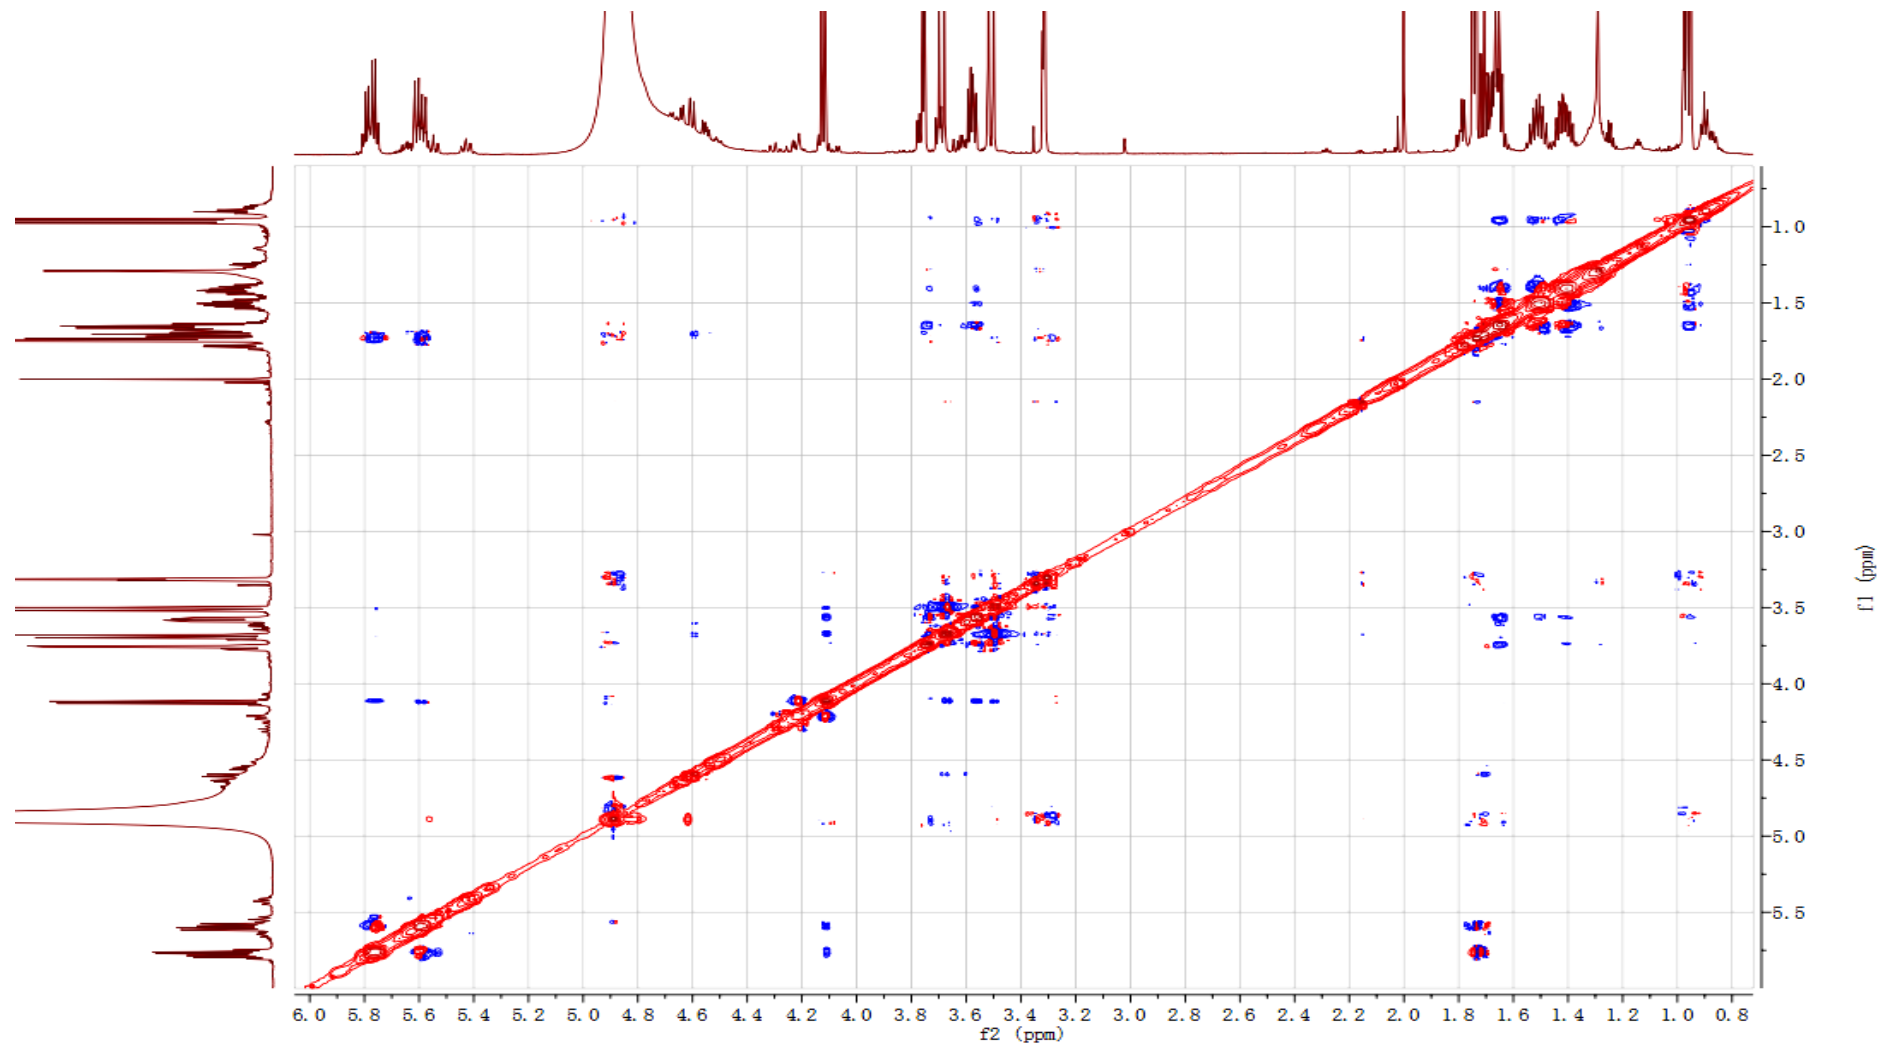

Figure S34. NOESY spectrum of new compound 5
